# Supplementary material for: Mesoscale processes regulating the upper layer dynamics of Andaman waters during winter monsoon
Source: Copernicus journal article supplement (doi:10.5194/os-2018-23), 2018-06-14
Supplement: Supplementary file [file os-2018-23-AC1-supplement.pdf]

# Mesoscale processes regulating the upper layer dynamics of Andaman waters during winter monsoon

\*Salini.T.C<sup>1</sup>, Smitha.B.R<sup>2</sup>, Sajeev.R<sup>1</sup>, Lix John. K<sup>1</sup>, Midhunshah Hussain<sup>1</sup>, Rafeeq.M<sup>2</sup>

<sup>1</sup> Cochin University of Science and Technology, Kochi, 682016, India

<sup>2</sup> Centre for Marine Living Resources & Ecology, Kochi, 682037, India

\*Corresponding Author. email: [salinitc@gmail.com](mailto:salinitc@gmail.com), ph.+91 984688249

## 1 Abstract

2 The characteristics of cold core eddies and its influence on the hydrodynamics and biological  
3 production in Andaman waters were studied using insitu and satellite observations. The specific  
4 structure and patterns of the temperature-salinity (T-S) profiles, nutrients and chl a indicate the  
5 occurrence of the eddy, the spatial extent of which is well marked in sea surface height anomaly  
6 (SSHA). The Cyclonic Eddies are tracked using Okubo-Weiss parameter of  $\sim 2 \times 10^{-11} / s^2$  centered  
7 at 8°N and 92°E, and 13°N and 93°E (CE1 and CE2 respectively). Insitu measurements are done  
8 in the eastern flank CE1 along 8°N and 92.5-93.5°E. Vertical currents recorded using Acoustic  
9 Doppler Current Profiles (ADCP) shows northward flow along the track (0.3m/s) while along the  
10 western flank, the flow is weak and southward. This evidence the occurrence of cyclonic eddy  
11 and the altimetry derived SSHA depicts the spatial extent. Analysis to explore the possible  
12 forcings to induce the occurrence of eddy, indicate baroclinic instability ( $Ri < 0.0001$ ) in the  
13 water column due to vertical shear in the horizontal flow. The presence of Bay of Bengal (BoB)  
14 water in the region as evidenced in the T-S profiles, and the presence of semiannual Rossby  
15 waves in the region accounts the contribution, whereas, wind stress curl was not a major  
16 inductive of divergence in the region. Though less significant, the eddy is formed to influence  
17 the nutrient pattern ( $NO_2$ ,  $NO_3$ ,  $PO_4$  and  $SiO_4$ ) and the biological production (chl a). The eddy  
18 influenced the nutrient pattern ( $NO_2$ ,  $NO_3$ ,  $PO_4$  and  $SiO_4$ ) and the biological production (chl a) in  
19 the region. CE2 is associated with convective mixing processes occurring along the northwest  
20 coast of Andaman due to the prevalent cold dry continental air from north east.

## 21 Introduction

22 The Sea around the Andaman and Nicobar Island chain is influenced by reversing  
23 monsoon with moisture rich summer winds and dry continental air flow from north-east during  
24 winter (Potemra et al., 1991). The region receives enormous runoff and suspended matter from  
25 Ayeyarwady-Salween river system, which has significant influence on the hydro-dynamics and  
26 oceanography (Robinson et al., 2007). The region is characterised by strong stratification,  
27 prevents vertical mixing, causes nutrient depletion in the upper layers and subsequently leads to  
28 oligotrophy. The seasonal winds, moderate or strong, though are experienced during the  
29 summer and winter months, are not found to exert any divergence or positive curl and nutrient  
30 pumping to enrich biological production is least encountered in these waters. The sea is less  
31 productive compared to the Arabian Sea and Bay of Bengal and average primary production  
32 during fall inter-monsoon is 283.19 mg C/m<sup>2</sup>/d followed by spring inter-monsoon (249 mg  
33 C/m<sup>2</sup>/d), summer monsoon (238.98 mg C/m<sup>2</sup>/d) and winter monsoon (195.47 mg C/m<sup>2</sup>/d)  
34 [Sanjeevan et al., 2011]. Earlier observations show that the eastern and western part of the  
35 island chain is governed by distinct water properties where west shows typical BoB  
36 characteristics, northeast is highly influenced by the Ayeyarwady and Salween river system and  
37 the southeast by the productive environment of Malacca strait (Salini et al., 2010). The region is  
38 least explored for oceanic processes and surveys conducted so far for understanding the  
39 biodiversity and the basin scale environment associated with the living resources indicate the  
40 absence of any major or seasonal processes that result in nutrient pumping to alter production  
41 pattern. However, the emergence of satellite techniques, especially the Altimetry and Ocean  
42 Color imageries on mesoscale to basin scale, the understanding of the upper layer dynamics has  
43 been strengthened. Explanations have come on such major processes in the BoB, especially on  
44 number of eddies and gyres and also the impact of cyclones, which causes enormous mixing in  
45 its path (Nuncio and Prasanna Kumar, 2012). Eddies are mesoscale processes (50–200 km  
46 diameter) and ubiquitous feature of the ocean occurs in both clock-wise and anti-clock wise  
47 direction, resulting in convergence/divergence at the center.

48 Mesoscale eddies play a dominant role in transportation of salt, heat and nutrients within the  
49 ocean (Dong et al., 2014) and enhance local production in oligotrophic areas (Hyrenbach et al.,  
50 2006), ultimately influencing the production pattern in each trophic level (Bakun, 2006).  
51 Mechanisms behind the eddy formation has been suggested by many researchers; different  
52 driving mechanisms have been attributed to eddy formation, such as Ekman pumping and

53 remote forcing from the equatorial Kelvin wave reflecting off the eastern boundary as Rossby  
54 wave. According to Yu et al. (1999), westward propagating Rossby wave, excited by the  
55 remotely forced Kelvin wave, contribute substantially to the variability of the local circulation  
56 in ocean. Using the multilayer model, Potemra et al. (1991) described coastal Kelvin wave,  
57 which originates at the equator and propagates around the entire western perimeter of the region  
58 around both the Andaman Sea and the Bay of Bengal. Mesoscale eddies are observed in the  
59 coastal waters of the Andaman and Nicobar Islands (Hacker et al. 1998 and Chen et al. 2013)  
60 based on in situ hydrographic measurements. Burnaprathepart et al. (2010) described the  
61 presence of eddies in Andaman Sea and its role in enhancing the primary productivity  
62 synthesizing number of vertical profiles on chl a, major nutrients, temperature, as well as  
63 salinity. However, there are no comprehensive study undertaken for this region to explain the  
64 role of eddies (cold and warm cores) in the Andaman waters as a whole in regulating the  
65 available biological production. In this context it is attempted to enumerate these mesoscale  
66 processes based on SSHA imagery and geostrophic current pattern along with in situ evidences.  
67 The objective of this present study is to identify such processes in the basin, to explain the  
68 forcing mechanism and its response in column dynamics as well as biogeochemistry.

69

## 70 **Data and Methodology**

71 In situ measurements were taken onboard FORV *Sagar Sampada* during 21 November –  
72 14 December 2011. The environmental characteristics are understood from station based  
73 measurements in the east and west of the island chain. However, the focus was to obtain a  
74 transect with 4 stations (Fig. 1) along the eddy. The meteorological parameters like air  
75 temperature, air pressure and humidity were also collected through the instruments/sensors  
76 attached to the IRAWS onboard in 15 minute interval. Profiles of temperature, salinity,  
77 dissolved oxygen and Sigma-t were obtained using SeaBird 911 Plus CTD with Niskin water  
78 samplers and deck unit for data acquisition. The datasets are processed for 1m bins. Salinity  
79 is also derived from water samples collected through Niskin samplers and using Guildline  
80 8400A Autosol Salinometer to validate the CTD derived data.. Twelve numbers of 10 liter  
81 Niskin water samplers were used to collect water samples from standard depths (surface, 10,  
82 20, 30, 50, 75, 100, 120, 150, 200, 300, 500, 750 and 1000 m) for measurements of dissolved

83 oxygen and nutrients. Temperature-Salinity profiles for water mass characteristics are based  
84 on averaged (climatological) data from Levitus et al. (1994). Mixed Layer Depth (MLD) is  
85 derived from CTD profiles as the depth at which the seawater density ( $\sigma_t$ ) exceeds the  
86 surface density by  $0.2 \text{ kg/m}^3$  (Sprintall and Tomczak, 1993). The Isothermal Layer Depth  
87 (ILD), the depth of the top of the thermocline, is defined as the depth at which surface  
88 temperature decreases by  $1 \text{ }^\circ\text{C}$  from sea surface temperature (Kara et al., 2000 and Rao and  
89 Sivakumar, 2003). The thickness of the barrier layer is computed as the difference between  
90 ILD and MLD (Lukas and Lindstrom, 1991).

91 Monthly composite of the chlorophyll data is obtained from the Distributed Active  
92 Archive Center (DAAC) of National Aeronautics and Space Administration, NASA. Dissolved  
93 oxygen was measured by Winkler titration. Analyses of nitrite, nitrate, phosphate and silicate  
94 were performed using a Skalar Analyser.

95 Wind stress curl (daily) data used was taken from ASCAT processed by  
96 NOAA/NESDIS utilizing measurements from the Scatterometer instrument aboard  
97 the EUMETSAT Metop satellites with a spatial resolution of 25 km; chl a data was taken from  
98 MODIS Aqua Level 3 at a spatial resolution of 4 km, downloaded from Ocean Color Website  
99 and processed using SeaDas. SST was obtained from MODIS Aqua Level 3 at a spatial  
100 resolution of 4 km downloaded from Ocean Color Website, while SSHA data obtained with 7  
101 day temporal resolution from AVISO for the period from January 2003-January 2013. The cold  
102 core eddy was recognized through SSHA with geostrophic current imagery obtained from  
103 <https://oceanwatch.pifsc.noaa.gov>, and was observed to be centered at  $7^\circ \text{ N}$  and  $90^\circ \text{ E}$  with  
104 current moving in cyclonic direction. Net heat flux, solar radiation, latent heat flux, and specific  
105 humidity were obtained from <http://oaf Flux.who i.edu>.

106 The eddies are spotted using two ways, first method is using SSHA contours and  
107 geostrophic currents, calculated from the following geostrophic equations,

108 
$$u = -\frac{g}{f} \frac{\partial h}{\partial y} \quad (1)$$

109 
$$v = \frac{g}{f} \frac{\partial h}{\partial x} \quad (2)$$

110 Where  $u$  and  $v$  are the zonal and meridional components of geostrophic currents,  $g$  is the  
111 gravitational acceleration,  $f$  is the Coriolis parameter,  $x$  and  $y$  are longitudinal, latitudinal co-  
112 ordinates and  $h$  is the SSHA.

113 Second method is using the Okubo-Weiss parameter, OW (Okubo, 1970 and Weiss,  
114 1991) and is defined as

$$115 \quad OW = s_n^2 + s_s^2 - w^2 \quad (3)$$

116 Where  $s_n$  is the normal strain component,  $s_s$  is the shear strain component and  $w$  is the relative  
117 vorticity.

$$118 \quad s_n = \frac{\partial u}{\partial x} - \frac{\partial v}{\partial y} \quad (4)$$

119

$$120 \quad s_s = \frac{\partial v}{\partial x} + \frac{\partial u}{\partial y} \quad (5)$$

$$121 \quad w = \frac{\partial v}{\partial x} - \frac{\partial u}{\partial y} \quad (6)$$

122 If the vortex core is dominated by vorticity, the negative Okubo-Weiss are predictable in  
123 the vortex core.

124 Wavelet transform is an appropriate analysis tool to study multi-scale, non-stationary  
125 processes occurring over finite spatial and temporal domain. In this study, the wavelet was  
126 used to analyse time series data of oceanographic parameters that contain non-stationary  
127 power at many different frequencies. This technique is used to decompose time series into its  
128 frequency components based on the convolution of the original time series with a set of  
129 wavelet functions, and if possible, determine both the dominant modes of variability, and  
130 how those modes vary with time. It expands functions in terms of wavelets, which are  
131 generated in the form of translations and dilations of a fixed function called the Mother  
132 Wavelet. In the present study the wavelet is applied to explain the temporal variation of  
133 SSHA in the eddy region to explore the life span and frequency of the processes during the  
134 10 years. Meyers et al. (1993) used wavelet analysis to study the propagation of mixed  
135 Rossby-gravity waves in an idealized numerical model of the Indian Ocean.

136 The phase speed for long baroclinic Rossby wave is given by  $C = \frac{-gH_0\beta}{f^2}$ , (7)

137 where  $g$  is the reduced gravity term (taken as  $0.04 \text{ m s}^{-2}$  for the first baroclinic mode),  $H_0$   
138 is the thermocline depth (taken as an annual mean depth of  $20^\circ\text{C}$  isotherm derived from Levitus  
139 and Boyer, 1994),  $f$  the Coriolis parameter and  $\beta = \frac{\partial f}{\partial \phi}$ , where  $\phi$  is the latitude.

## 140 **Results and Discussion**

### 141 **Physical characteristics of the Eddy region**

142 The region is characterized by warm ( $27.6\text{--}28^\circ\text{C}$ ), humid ( $72\text{--}77\%$ ) air and wind is  
143 from northeast, suggesting the prevalence of northeast monsoon condition of magnitude in the  
144 range of  $10\text{--}12 \text{ m/s}$  with comparatively lower speed ( $10 \text{ m/s}$ ) in the western part and higher  
145 speed ( $12 \text{ m/s}$ ) in the eastern part of the eddy (referred to hereafter as CE1).

146 The SST varies in the range of  $28.4\text{--}28.8^\circ\text{C}$  with lower temperatures near the coastal  
147 water compared to offshore; the surface salinity ( $33.00 \text{ psu}$ ) and density ( $20.40 \text{ kg/m}^3$ ) values,  
148 on the other hand, are similar in coastal and offshore waters. Regional water mass  
149 characteristics from temperature, salinity, and density profiles show that the area is occupied by  
150 BoB waters with temperature ranging from  $28.0\text{--}28.5^\circ\text{C}$ , salinity  $33.2\text{--}33.8 \text{ psu}$ , and density  
151  $20.6\text{--}20.8 \text{ kg/m}^3$  (Salini et al., 2018). Vertical temperature distribution along  $8^\circ\text{N}$  (Fig. 2b)  
152 shows warm ( $>28.5^\circ\text{C}$ ) and thick isothermal layer ( $\sim 54 \text{ m}$ ) in the western part and a gradual  
153 decrease towards east ( $20 \text{ m}$ ). The most important feature in the thermal structure is the  
154 upsloping of isothermal layer, which is prominent in the subsurface ( $54\text{--}220 \text{ m}$ ) also, and the  
155 mixed layer depth (MLD) shoaled from west to east ( $47\text{--}19 \text{ m}$ ). Vertical salinity and density  
156 distribution show the presence of low saline ( $32.9\text{--}33.1 \text{ psu}$ ) water in the upper  $30 \text{ m}$ ,  
157 with an upsloping tendency (Fig. 2 c, d) as in the case of temperature. Similar pattern is  
158 reflected in density characteristics too.

159 The horizontal current structure at  $8^\circ \text{N}$  along  $92.5^\circ \text{E}$  to  $93.5^\circ \text{E}$  shows irregular current  
160 pattern from surface to  $90 \text{ m}$  (Fig. 3). Along the eastern part of the  $100 \text{ km}$  transect, major flow  
161 is towards south ( $\cong 30 \text{ km}$ ), west to it with a narrow and weak northward flow, followed by  
162 major southward drift up to  $40 \text{ m}$ . However, the response to this irregular pattern is  
163 insignificant in the T-S profiles and so the eastern part of the transect ( $\sim 60 \text{ km}$ ) is not  
164 considered for addressing the eddy. In the western flank, the northward and the subsequent flow

165 towards south indicate cyclonic flow direction. The current recorded at 16 m depth is  
166 considered for near surface pattern and this shows the presence of a northern component with a  
167 magnitude of 0.3 m/s in the eastern part negligible speed in the western part, directed westward.  
168 But at 40 m the current magnitude decreases in the eastern flank (0.1 m/s) and increases in  
169 magnitude in the western flank (0.1 m/s) with direction changing from northeast to southwest.  
170 The current at 88 m also follows the same pattern, but magnitude changes from 0.5 m/s in the  
171 western part and 0.4 m/s in the eastern part. The upsloping in the T-S profiles concurrent to this  
172 confirms the feature as a subsurface cyclonic eddy. The flow in the eastern flank is towards  
173 north (0.3 m/s) and at west it is to the south (0.5 m/s). The data was analyzed for all 8 m cells up  
174 to 88 m depth and found to follow the same pattern as that of near surface but with a decreasing  
175 magnitude. The dataset was seen to contain spurious values below 88 m and hence discarded.

### 176 **Eddy Generation Mechanism**

177 The possible physical mechanisms that govern the eddy includes the wind stress curl,  
178 topographic instability, shear flows, baroclinic instability and the radiation of Rossby waves  
179 from poleward propagating coastal Kelvin waves etc. (White, 1977 and Kessler, 1990). Daily  
180 wind stress curl is examined to identify the local forcing that contributes to the formation and  
181 sustenance of the eddy. Curl of the eddy region from ASCAT wind data shows negative values  
182 in the range of  $-5.6 \times 10^{-8}$  and  $-8.24 \times 10^{-8}$  Pa/m, indicating convergence and hence the contribution  
183 due to wind stress curl is ruled out.

184 Other possible eddy generation mechanisms are differential mixing of region with the  
185 adjacent sea mainly through inflow from Malacca Strait and freshwater influx from adjoining  
186 rivers leading to strong density variations in the water column. This variation may reduce or  
187 enhance the mechanical effects in the form of eddy or meanders in the region. This is measured  
188 based on the estimated Richardson Number (Ri). According to Miles (1961), the flow is stable  
189 if  $Ri > 0.25$ .

190 Ri is calculated as 
$$Ri = \frac{N^2}{\left(\frac{\partial u}{\partial z}\right)^2} \quad (7)$$

191 where  $N^2$  is the Brunt Vaisala frequency (BV),

192 
$$N^2 = \frac{-g}{\rho_0} \frac{\partial \sigma_t}{\partial z} \quad (8)$$

193 where  $g$  is the gravitational acceleration,  $\rho_0$  the average sea water density,  $z$  the depth, and  $\sigma_t$  is  
194  $\rho - 1000$  where  $\rho$  is the sea water density. The denominator term  $\partial u / \partial z$  in (7) is the velocity  
195 gradient, which is an indicator of strength of mechanical generation calculated from vertical  
196 current profiles acquired using ADCP.

197 The low BV (avg.  $3.165 \times 10^{-5} \text{ s}^{-1}$ ) and large velocity gradient (avg.  $3.968 \text{ s}^{-2}$ ) resulted  
198 into low Ri (avg. 0.0001), indicating unstable well mixed water column. These lead to  
199 instability in the water column and favor eddy-like perturbation in the region.

200 Instability arises either as a result of mixing of different water masses or due to the shear flows.  
201 Mixing with other water masses can be ruled out as there is clear evidence of the presence of  
202 BoB water in the eddy region from the T-S profiles. Another possibility is the prevalence of  
203 planetary waves that might modulate the horizontal flow and induce shear, thereby causing  
204 instability; such instability has been well reported along this region by Schott et al., 2009 and  
205 Rao et al., 2010, that planetary waves influence the near surface circulation through local and  
206 remote forcing. The role of such planetary wave influence on eddy generation mechanism was  
207 examined using altimeter data and mapping of planetary wave propagation was carried out to  
208 identify their influence on regional circulation. Referring to Yu (2003), Hovmuller diagram of  
209 SSHA at  $8^\circ\text{N}$  along  $89^\circ\text{E}$  to  $94^\circ\text{E}$  was analyzed to track the planetary wave and are plotted (Fig.  
210 4). Low SSHA in this region from mid-November to mid-January indicates the presence of  
211 upwelling mode Rossby wave (Girishkumar et al., 2011). Negative SSHA is almost horizontal,  
212 indicating a fast propagation of Rossby wave. Further west (nearer to the eddy location),  
213 negative SSHA showed a steeper slope, indicating a slower propagation. The westward  
214 propagating signal takes about 45-60 days to travel from the coast of Nicobar Island chain  
215 (Potemra et al., 1991) to the core of the eddy region, which yields phase velocity of the  
216 westward signal at 0.20 m/s. The theoretical phase speed of Rossby wave at  $8^\circ\text{N}$  that propagates  
217 westwards is calculated as 0.21 m/s, suggesting that the signal appearing in the plot is a Rossby  
218 wave that is generated on the west coast of Nicobar island chain. The estimated speed of the  
219 wave is close to the theoretical wave speed and the estimate also compares well with earlier  
220 results of Yang et al. (1998), Yu (2003) and Girishkumar et al. (2011). The Rossby waves were



221 produced by radiation from the west coast of Nicobar Island chain in association with poleward  
222 propagating coastal Kelvin waves (Potemra et al., 1991). The baroclinic instability due to the  
223 interaction of westward propagating Rossby waves and local wind stress curl cause meanders  
224 and eddies in BoB (Nuncio and Prasanna Kumar, 2012). Using a numerical model, Kurien et al.  
225 (2010) also concluded that baroclinic instability plays a key role in meander growth and eddy  
226 generation in BoB. Sreenivas et al. (2012) argued that coastal Kelvin waves and the associated  
227 radiated Rossby waves from the east play a dominant role in the mesoscale eddy generation in  
228 BoB. Chen et al. (2012) studied the interannual variability mechanism of the mesoscale eddies  
229 in BoB and pointed that the eddy activities do not directly link to El Nino Southern Oscillation  
230 (ENSO) events and are sensitive to the baroclinic instability of the background flow.

231 To ascertain the periodicity of SSHA, the data is again subjected to continuous wavelet  
232 transforms with Morlet wave as mother wavelet following Torrence and Compo (1998). It is  
233 clear from Fig. 5 that the dominant mode of variability is semiannual. In the Andaman waters,  
234 the wave period is more variable due to the effect of westward propagating Rossby wave from  
235 the coastally trapped Kelvin wave (Vialard et al., 2009 and Nienhaus et al., 2012). From power  
236 and global wavelet spectrum, the predominant frequencies are in semiannual and annual modes.  
237 The annual mode seems to be reduced in intensity compared to the semiannual mode. On the  
238 basis of the results of wavelet analyses, it is clear that the semiannual Rossby waves are  
239 significant in the years 2005, 2008, 2010 and 2011, whereas the annual wavelets are significant  
240 during 2006-2009. Therefore, we concluded that the westward propagating Rossby wave  
241 radiated from the coastal Kelvin wave contribute to cyclonic eddy in the region.

## 242 **Chemical and biological response of the eddy**

243 Concurrent with the thermohaline oscillations, the vertical structure of dissolved oxygen  
244 (DO) also demonstrates fluctuations above 90 m depth. The 4.22 ml/L DO contour shoaled  
245 from a depth of about 47 m (92.3°E) to 25-30 m at eastern flank of the eddy (93.3°E). The upper  
246 nitrate (NO<sub>3</sub>) concentration is in detectable levels (0.67-0.98 μM) and shows slight upsloping  
247 towards the eastern flank (93.3°E). The phosphate (PO<sub>4</sub>) concentration in the upper water was  
248 also at a detectable level and showed a slight upsloping towards the eastern side (0.12 μM at  
249 92.3°E and 0.27 μM at 93.3°E). Further, the vertical distribution of silicate (SiO<sub>4</sub>) showed slight  
250 upsloping towards the eastern periphery (0.77 μM at 92.3°E to 1.62 μM at 93.3°E). Hence,

251 concomitant with the thermohaline characteristics, the vertical distribution of nutrients also  
252 showed oscillations in the upper water column.

253 The physical and chemical characteristics do reflect on the regional biology and this is  
254 well reflected in the surface chl a distribution. Chl a derived from ocean colour imagery (Fig. 6)  
255 can illustrate the standing stock of the primary consumers for the optical depth and is  $0.5 \text{ mg/m}^3$   
256 in the eddy region compared to the adjacent regions ( $0.1 \text{ mg/m}^3$ ). This increases within the eddy  
257 in association with the nutrient values explains the impact of churning due to the eddy. And this  
258 points out the significance of such mesoscale processes that influence the production marginally  
259 in the Andaman waters.

### 260 **Satellite evidence (SSHA based) for cyclonic eddies**

261 The distribution of mesoscale production favourable pockets is examined using monthly  
262 SSHA and geostrophic current pattern (Fig. 7a-d) for the winter monsoon (November-February,  
263 2011). This evidences the presence of one cyclonic eddy (CE), of which CE1 is the same that  
264 encountered during the in situ measurements. CE1 was stronger as indicated by negative SSHA  
265 between  $5^\circ$ – $9^\circ$ N with core at  $7^\circ$  N latitude and is observed to be propagating from  $93^\circ$ E to  $86^\circ$ E  
266 within one month (November to December). The eddy intensity is more during November and  
267 December, with a negative value of  $\sim 0.14\text{m}$ . In December CE1 propagates westward to BoB and  
268 is observed between  $86^\circ$ – $93^\circ$ E. It is completely replaced from Andaman waters by January and  
269 exhibited a positive SSHA ( $0.18 \text{ m}$ ). But the low SSHA observed in BoB waters even during  
270 February centered at  $86^\circ$  E. The shape of the eddy is elliptical with its axis oriented in east west  
271 direction. The eddy CE1 characteristics and generating mechanism is described in the above  
272 sections (3.3.1-3.3.3) using in situ as well as satellite observations.

273 The SSHA maps also revealed a low SSHA pocket located at  $13^\circ$ N and  $93^\circ$ E during  
274 November with negative anomaly of  $\sim 0.12\text{m}$ . This is marked as CE2. The negative anomaly is  
275 more in November with SSHA of  $-0.12 \text{ m}$ , and the intensity decreases during December with  
276 SSHA of  $\sim 0.10$ . Negative anomaly is replaced by positive anomaly of  $0.16\text{m}$  during January.

277 In order to identify eddies in a prominent way, Okubo-Weiss (OW) parameter method is  
278 also exercised in this study. Eddies are characterized with negative OW parameter at the eddy  
279 core due to the dominance of vorticity over strain components; while strain dominated areas

280 have positive OW parameter. According to Isern-Fontanet et al. (2003), closed contours of OW  
281 with a value of  $\sim 2 \times 10^{-11} /s^2$  corresponding to the threshold value for defining eddies. The  
282 threshold value was fixed as same as Isern-Fontanet et al. (2003) for defining eddies and finding  
283 out the vorticity dominated area. From the Fig. 3.7, the closed contours of OW, and cyclonic  
284 current structure confirmed the presence of an intensified cyclonic eddy at 8°N and 93°E. But  
285 the area characterized with threshold value less than  $\sim 2 \times 10^{-11} /s^2$ , negative SSHA and the  
286 cyclonic current structure at 13°N and 93°E indicated the presence of a weak eddy.

287 Having recognized eddies from SSHA, OW and geostrophic current maps, it is further  
288 confirmed the occurrence of prevailing processes using SST and chlorophyll. Cyclonic eddies  
289 formed due to the divergent forcing at the center is occupied with sub-surface nutrient rich  
290 waters at the core. These areas of negative SSHA are characterised with relatively cool and high  
291 chlorophyll concentration.

292 SST is high during the initial phase of winter months, i.e. in November (Fig. 8a), with  
293 higher values in the entire region of Andaman waters (28.2-28.8 °C). During December (Fig.  
294 8b), the values change to 27.6-28.8 °C. Further, during January (Fig. 8c) and February (Fig. 8d),  
295 the basin wide temperature is in the range to 27-29 °C and 26-29 °C respectively. Though the  
296 Andaman waters are warm in general, the cold core eddies identified in this area show relatively  
297 cool temperatures owing to the prevalent cyclonic flow associated with it. CE1 records a  
298 temperature of 28.6 °C during November, and when the eddy advances to the Andaman waters  
299 the surface temperatures begin to cool. SST decreases from 28.6 to 28.2 °C during December;  
300 SST again decreases to 27.6 °C in January. But in February the temperature remains the same as  
301 in January. CE2 displays a temperature of 28.6 °C during November; during December, the  
302 temperature decreases to 28.2 °C, and decreases further to 27 °C during January and again in  
303 February (26.5 °C). The hike in temperature along the eastern Andaman waters might be due to  
304 the intrusion of low saline waters through Malacca strait as inferred by Rama Raju et al., 1981,  
305 and Tan et al., 2006.

306 High chlorophyll concentration is expected in the eddy region due to enhancement of  
307 nutrients at the surface. These cold core eddies are important because they are in the area of  
308 high biological activity and these areas are observed to have strong physical and

309 biogeochemical coupling resulting in high chlorophyll concentration. Generally, Andaman  
310 waters are oligotrophic in nature with less chlorophyll concentrations (Vijayalakshmi et al.,  
311 2010). The existence of cyclonic circulation increases the chl a levels in the eddy region. When  
312 the cyclonic flow advances, increased chl a level was observed in the eddy locations at CE1 and  
313 CE2. CE1 recorded  $0.1 \text{ mg/m}^3$  during November, increased to  $0.8 \text{ mg/m}^3$  during December and  
314 decreased again to  $0.3 \text{ mg/m}^3$  in January (Fig. 8 a-d). Chl a level decreased to  $0.2 \text{ mg/m}^3$  in  
315 February. CE2 revealed a very low value ( $0.1 \text{ mg/m}^3$ ) during November; during December, chl  
316 a began to increase in the eddy region ( $0.4 \text{ mg/m}^3$ ) and in January also the pattern followed with  
317 a concentration of  $0.4 \text{ mg/m}^3$ , which decreased to  $0.2 \text{ mg/m}^3$  in February.

318 The role of wind stress curl on inducing the eddy was verified with weekly progress in  
319 the wind stress curl (ASCAT) for the pockets. At CE1 the curl varied from  $-4.43 \times 10^{-7}$  to  
320  $1.28 \times 10^{-6} \text{ Pa/m}$ , but the mode of the signal was  $-1.47 \times 10^{-7} \text{ Pa/m}$ . The wind curl at CE2 showed  
321 values between  $-2.87 \times 10^{-7}$  and  $2.09 \times 10^{-6} \text{ Pa/m}$  and mode was  $-3.25 \times 10^{-8} \text{ Pa/m}$ . However, the  
322 occurrence of maximum negative values implies that wind is not a dominant causative factor for  
323 the generation of eddy.

324 At CE2, the surface temperature is low ( $27-27.2 \text{ }^\circ\text{C}$ ) compared to the nearby locations  
325 and the MLD is also deeper ( $>70\text{m}$ ). Wind is northeasterly, with a magnitude of 4 to 7 m/s.  
326 Specific humidity of 14 to 18 g/kg implies dry continental air during the period. Net heat flux  
327 varies from  $-98$  to  $-134 \text{ W/m}^2$  during November-February. This causes heat loss due to  
328 evaporation (latent heat flux  $-220$  to  $-312 \text{ W/m}^2$ ), resulting in cooling in the sea surface. Solar  
329 radiation varies from 114 to  $170 \text{ W/m}^2$  in the eddy region. This low solar insolation reduces the  
330 SST, resulting densification of water. Thus, the surface water sinks and nutrient rich water  
331 entrains from deeper depths. This evidences that the atmospheric forcing causes surface cooling  
332 and the resulting convective mixing entrains nutrients into the upper layer which activates the  
333 primary production (Prasanna Kumar and Prasad, 1996, Madhupratap et al., 1996). Chatterjee et  
334 al. (2016) reported that the equatorial signal of Kelvin comes into the Andaman Sea through the  
335 Great Channel, travels along the eastern boundary, and exits to BoB through Preparis Channel,  
336 with a smaller part flowing southward along the east coast of the Andaman Islands. In this  
337 context it is presumed that the generating mechanism of CE2 is Kelvin. The instability owing to

338 the flow from Ayeyarwady-Salween river system is also supposed to be the reason for CE2  
339 origin.

## 340 **Conclusion**

341 The column dynamics, forcing mechanisms, chemical and biological responses of cyclonic  
342 eddies are explained for the Andaman waters based on a suit of in situ and satellite datasets. The  
343 eddies are tracked using Okubo-Weiss parameter and the eddy CE1 is strong compared to CE2  
344 based on the threshold Okubo-Weiss parameter of  $2 \times 10^{-11} / s^2$ . The processes are small scale in  
345 nature within 100-350 km diameter, and are found to be induced as a result of baroclinic  
346 instability arising owing to the westward propagating Rossby wave, semi-annual mode with  
347 phase speed of 0.20 m/s for CE1 and CE2 may be induced by Kelvin and the instability occurs  
348 due to the Ayeyarwady-Salween flow. While CE2 is associated with the process of convective  
349 mixing process occurring in the region due to cold dry continental air from north east. The study  
350 concludes that, in addition to the mesoscale processes, the convective mixing occurring along  
351 the northwest coast of Andaman is taking a substantial role in triggering the biological  
352 production of Andaman waters. Considerable increases in the regional surface biological  
353 production indicates the complementary role of such processes in bringing up the quality of  
354 production in Andaman waters. The role of convective mixing and eddies in the dynamics of the  
355 Andaman waters are explained for the first time.

356

## 357 **Acknowledgements**

358 Authors are grateful to the Ministry of Earth Sciences for supporting  
359 the work and for providing facilities onboard FORV Sagar Sampada for in-situ  
360 measurements. All the fellow participants of the cruise FORV SS292 are  
361 thankfully acknowledged. In situ data are obtained from FORV Data Centre in CMLRE. ASCAT  
362 Scatterometer wind field is obtained from NOAA/NESDIS. The TOPEX/Poseidon SSHA  
363 product is generated from the Merged Geophysical Data Record. Chlorophyll data was retrieved  
364 from GSFC NASA. Heat flux data is provided by WHOI OAF flux project.

## 365 **References**

366 Bakun, A. (2006). Fronts and Eddies as Key Structures in the Habitat of Marine Fish  
367 Larvae: Opportunity, Adaptive Response and Competitive Advantage. *Scientia Marina*, 70 (S2),  
368 105–122.

369 Buranapratheprat, A., Laongmanee, P., Sukramongkol, N., Prommas, R., Promjinda, S., &  
370 Yanagi, T. (2010). Upwelling Induced by Mesoscale Cyclonic Eddies in the Andaman  
371 Sea. *Coastal Marine Science*, 34 (1), 68–73.

372 Chen Gengxin, Wang Dongxiao & Hou Yijun. (2012). The features and interannual variability  
373 mechanism of mesoscale eddies in the Bay of Bengal. *Continental Shelf Research*, 47, 178-185.

374 Chen, X., Pan, D., Bai, He, X., Chen, C.A., & Hao, Z. (2013). Episodic Phytoplankton  
375 Bloom Events in the Bay of Bengal Triggered by Multiple Forcings. *Deep Sea Research Part I:  
376 Oceanographic Research Papers*, 73, 17–30.

377 Dong, C., McWilliams, J.C., Liu, Y., & Chen, D (2014). Global heat and salt transports by eddy  
378 movement. *Nat. Commun.*, 5, 3294.

379 Girishkumar, M.S., Ravichandran, M., McPhaden, M.J., & Rao, R.R. (2011). Intraseasonal  
380 variability in barrier layer thickness in the south central Bay of Bengal. *Journal of Geophysical  
381 Research*, 116, C03009.

382 Hacker, P., E. Firing, J. Hummon, Gordon, A.L., & Kindle, J.C. (1998). Bay of Bengal Currents  
383 during the Northeast Monsoon. *Geophysical Research Letters*. 25 (15), 2769–2772.

384 Hyrenbach, K. D., Veit, R.R., Weimerskirch, H., & Hunt, G.L. (2006). Seabird Associations with  
385 Mesoscale Eddies: The Subtropical Indian Ocean. *Marine Ecology Progress Series*, 324, 271–  
386 279.

387 Jury, R. M., & Huang, B. (2004). The Rossby wave as a key mechanism of Indian Ocean climate  
388 variability, *Deep Sea Res. Part I*, 51, 2123–2136.

389 Kessler, W. S. (1990). Observations of long Rossby waves in the northern tropical Pacific. *J.  
390 Geophys. Res.*, 95, 5183–5217.

391 Kurien, P., Ikeda, M., & Valsala, V.K. (2010). Mesoscale variability along the east coast of India  
392 in spring as revealed from satellite data and OGCM simulations, *J. Oceanogr.*, 66, 273–289.

393 Levitus, S., & Boyer, T. (1994). World Ocean Atlas 1994, Vol 4: Temperature, NOAA Atlas  
394 NESDIS 4, U.S. Govt. Printing Office, 150.

395 Levitus, S., Burgett, R., & Boyer, T. (1994): World Ocean Atlas 1994, Vol 3: Salinity, NOAA  
396 Atlas NESDIS 3, U.S. Govt. Printing Office, 150.

397 Madhupratap, M., Prasanna Kumar,S., Bhattathiri, P.M.A., Dileep kumar, M., Raghukumar, S.,  
398 Nair., K.K.C., & Ramaiah, N. (1996). Mechanism of the biological response to winter cooling in  
399 the northeastern Arabian Sea. *Nature* ,384, 549 – 552.

400 Meyers, S. D., Kelly, B.G., & O'Brien, J.J. (1993). An introduction to wavelet analysis in  
401 oceanography and meteorology: With application to the dispersion of Yanai waves. *Mon. Wea.*  
402 *Rev.*, 121, 2858–2866.

403 Miles, J.W. (1961). On the stability of heterogeneous shear flows. *Journal of Fluid Mechanics*,  
404 10, 496-508.

405 Nienhaus, M. J., Subrahmanyam, B., & Murty, V.S.N. (2012). Altimetric observations and  
406 model simulations of coastal Kelvin Waves in the Bay of Bengal, *Mar. Geod.*, 35(1), 190–216.

407 Nuncio, M., & Prasanna Kumar, S. (2012). Life cycle of eddies along the western boundary of  
408 the Bay of Bengal and their implications, *J. Marine Syst.*, 94, 9-17.

409 Potemra, J.T., Luther, M.E., & O'Brien, J.J. (1991). The seasonal circulation of the upper ocean  
410 in The Bay of Bengal. *Journal of Geophysical Research*, 96, 667-683.

411 Prasanna Kumar, S. & Prasad, T.G. (1996). Winter cooling in the northern Arabian Sea. *Current*  
412 *Science*, 71, 834-841.

413 Rama Raju, D. V., Gouveia, A. D., & Murthy, C. S. (1981). Some physical characteristics of  
414 Andaman Sea Waters during winter. *Indian Journal of Marine Sciences*, 10, 211–218.

415 Robinson, R.A.J., Bird, M.I., Oo, N.W, Hoey, T.B., Aye, M.M.D., Higgitt, L., Lud, X.X., Swe,  
416 A., Tun, T., & Win, S.L. (2007). The Irrawaddy river sediment flux to the Indian Ocean:the  
417 original nineteenth-century data revisited. *Journal of Geology*. 115, 629–640.

418 Salini, T.C., Fanimol, C.L., Smitha, B.R., Jayalakshmi, K.J., Asha Devi, C.R., Sanjeevan, V.N.,  
419 Saravanane, N., & Sajeev, R. (2010). Oceanography of the Andaman Waters: Physico-chemical  
420 and biological characteristics during Januaryuary 2009. In: Indian Ocean Marine Living  
421 Resources, Book of Abstracts (Ed. G.V.M.Gupta et al), Centre for Marine Living Resources and  
422 Ecology, Ministry of Earth Sciences, Kochi, 29.

423 Sanjeevan, V.N., Smitha, B.R., Ashadevi, C.R., Abdul Jaleel, K.U. and Jayalalshmi, K.J., 2011.  
424 Revalidation of Potential Yield from Indian EEZ.A trophodynamic approach. *In Report of the*  
425 *Working Group for revalidating the potential of fishery resources in the Indian EEZ*, New Delhi.

426 Schott, F. A., Xie, S.P., & McCreary Jr., J.P. (2009). Indian Ocean circulation and climate  
427 variability, *Rev. Geophys.*, 47, RG1002.

428 Sindhu, B., Suresh, I., Unnikrishnan, A.S., Bhatkar N.V., Neetu, S., Michael, G S. (2007).  
429 Improved bathymetric datasets for the shallow water regions in the Indian Ocean. *J. Earth Syst.*  
430 *Sci.*, 116(3), 261-274.

431 Sreenivas, P., Chowdary, J.S., Gnanaseelan., C. (2012b). Impact of tropical cyclones on the  
432 intensity and phase propagation of fall Wyrтки jets. *Geophys Res. Lett.*, 9, L22603.

433 Tan, C.K., Ishizaka, J., Matsumura, S., Md.Yusoff, F., Hj.Mohamed, & M.I. (2006). Seasonal  
434 variability of SeaWiFS chlorophyll a in the Malacca Straits in relation to Asian monsoon.  
435 *Continental Shelf Research*, 26, 168-178.

436 Torrence C., & Compo, G.P. (1998). A Practical Guide to Wavelet Analysis, *Bull. of the*  
437 *American Met. Soc.*, 79, 61-78.

438 Vialard, J., Shenoi, S.S.C., McCreary Jr, J.P., Shankar, D., Durand, F., Fernando, V., & Shetye,  
439 S.R. (2009). Intraseasonal response of the northern Indian Ocean coastal waveguide to the  
440 Madden-Julian Oscillation, *Geo. Phys. Res. Letts.*, 36.

441 Vijayalakshmi R. Nair, & Gireesh, R. (2010). Biodiversity of chaetognaths of the Andaman Sea.  
442 Indian Ocean. *Deep Sea Research II*, 57, 2135-2147.

443 White, W. B. (1977). Annual forcing of baroclinic long waves in the tropical North Pacific. *J.*  
444 *Phys. Oceanogr.*, 7, 50–61.



445 Yang, J., Yu, L., Koblinsky, C.J., & Adamec, D. (1998). Dynamics of the seasonal variations in  
 446 the Indian Ocean from TOPEX/POSEIDON sea surface height and an ocean model, *Geophys.*  
 447 *Res. Letts.*, 25 (11), 1915 - 1918.

448 Yu, L. (2003). Variability of the depth of the 20°C isotherm along 6°N in the BoB: its response  
 449 to remote and local forcing and its relation to satellite SSH variability. *Deep-Sea ResearchII*, 50,  
 450 2285–2304.

451 Yu, L. S., & Rienecker, M.M. (1999). Mechanisms for the Indian Oceanwarming during the  
 452 1997-98 El Nino. *Geophys. Res. Lett.*, 26 735738.

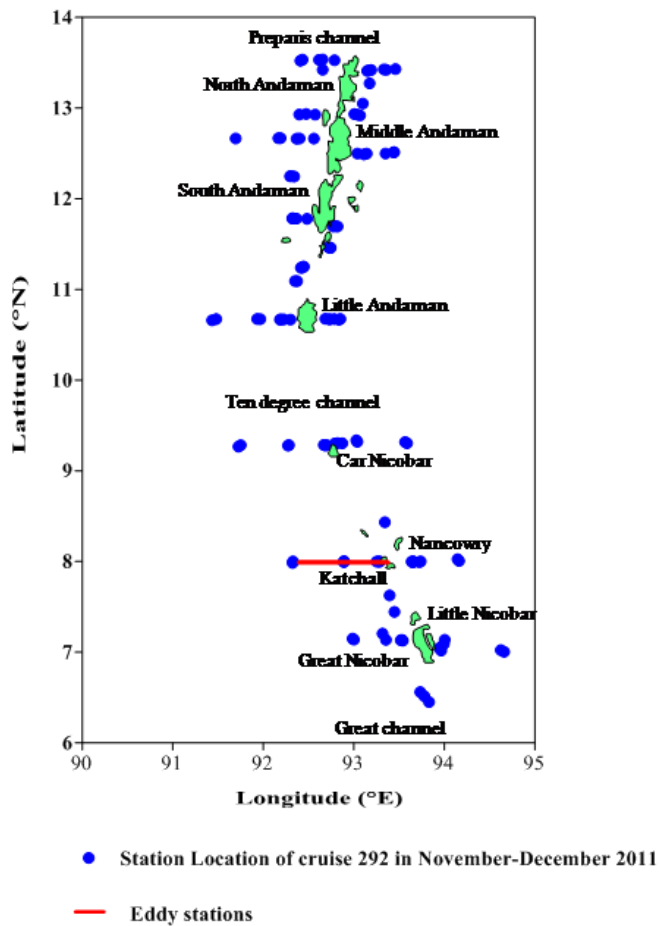

Fig. 1 Station Location

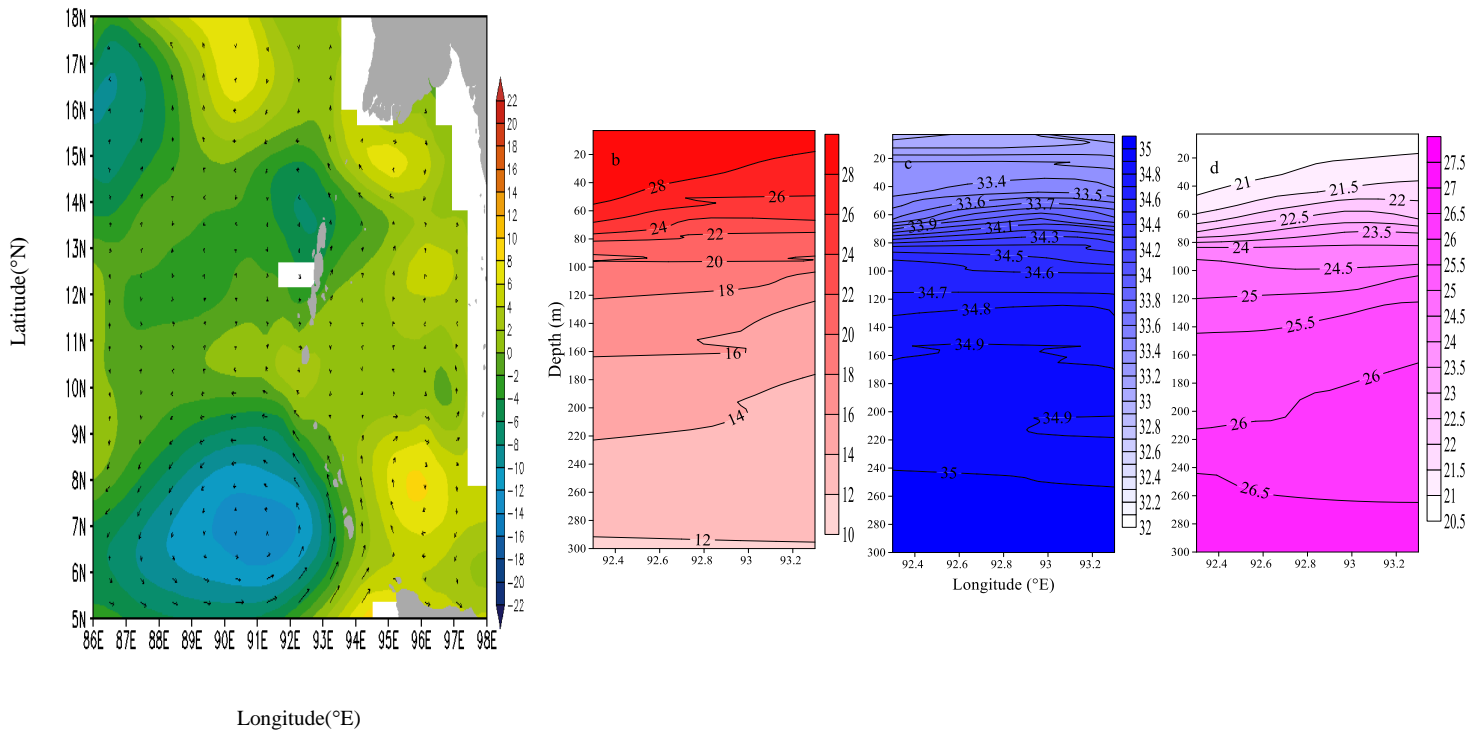

Fig. 2 a) Sea Surface Height (cm- Aviso weekly) and geostrophic current (cm/s) and the eddy location

b) Vertical temperature (°C), c) salinity and d) density (kg/m<sup>3</sup>) distribution at the eddy location

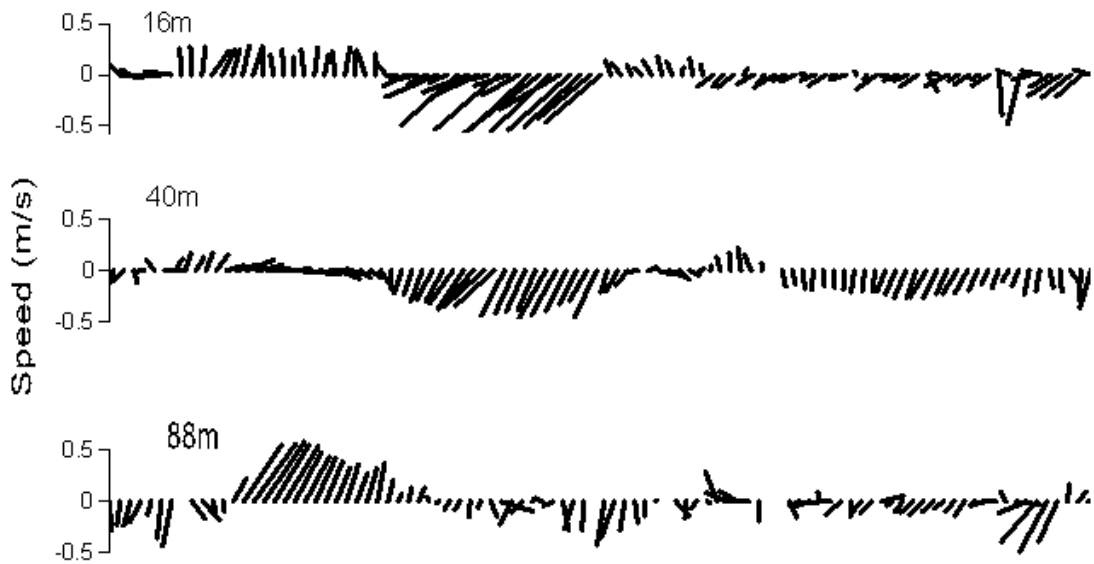

Fig. 3 Horizontal current (m/s) structure at different depths along 8°N

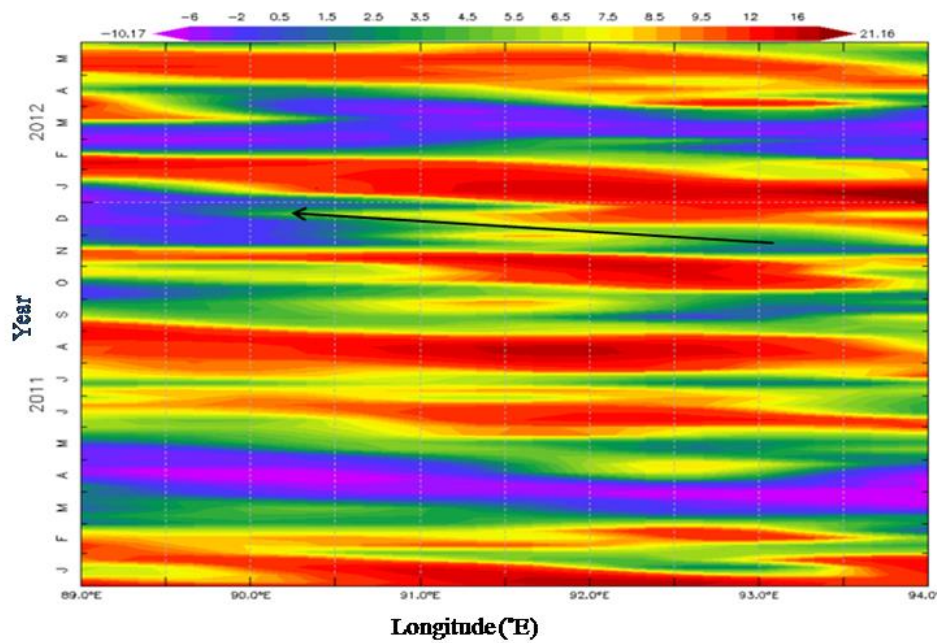

Fig. 4 Hovmuller diagram of SSHA(m) (Aviso monthly) along 8°N

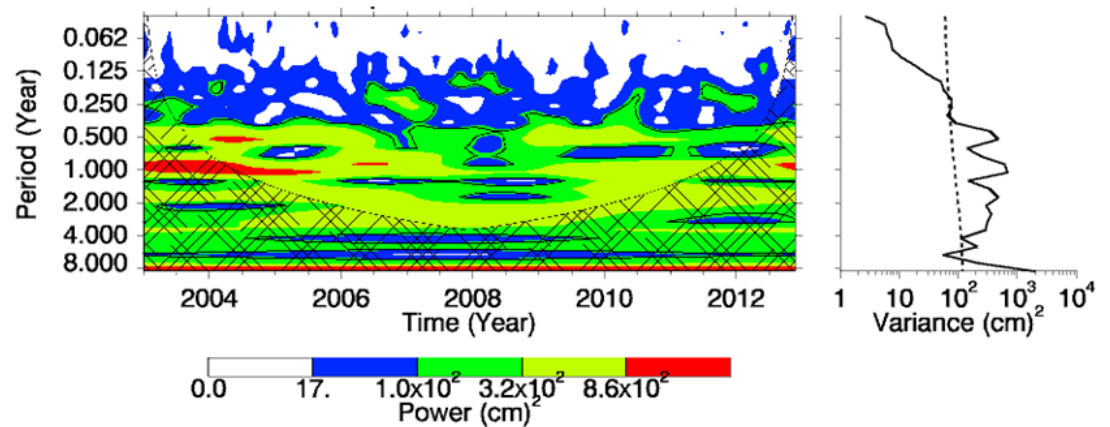

Fig. 5. Wavelet spectra of SSHA (m- Aviso monthly from 2003-2013) along 8°N

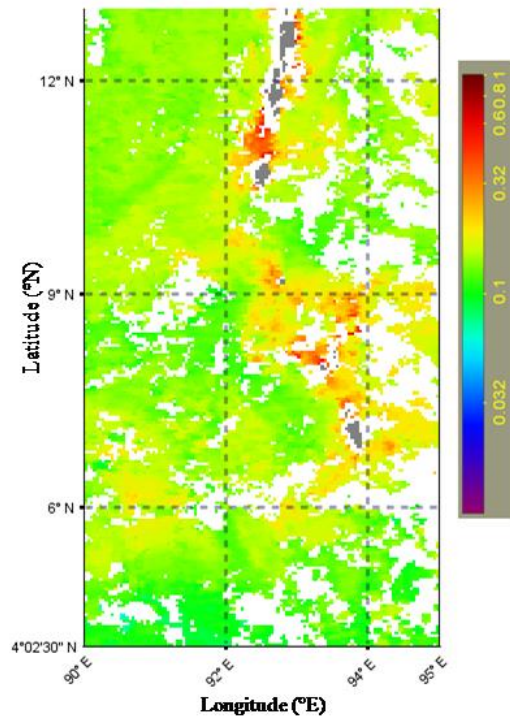

Fig. 6 chl a (mg/m<sup>3</sup>- weekly MODIS Aqua) pattern during the insitu observation

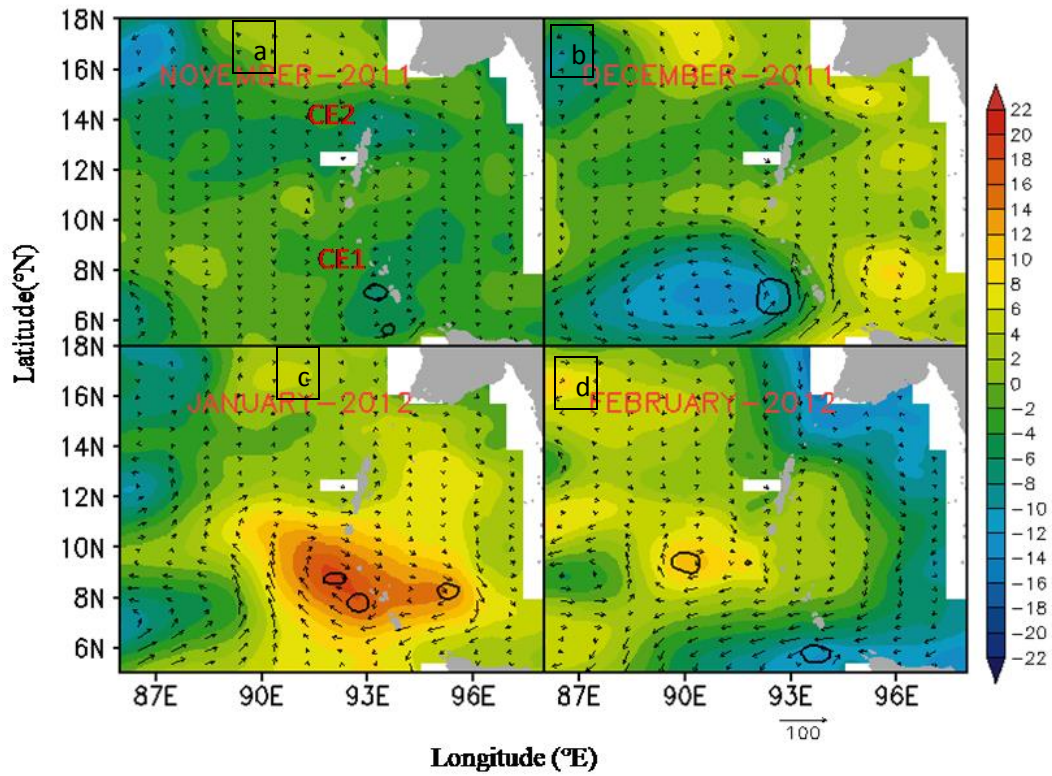

Fig. 7 Merged map of SSHA (m), Geostrophic current (cm/s) and Okubo-Weiss parameter (Black contour of  $-2 \times 10^{-11} / s^2$ ) from Aviso during a) November b) December c) January d) February

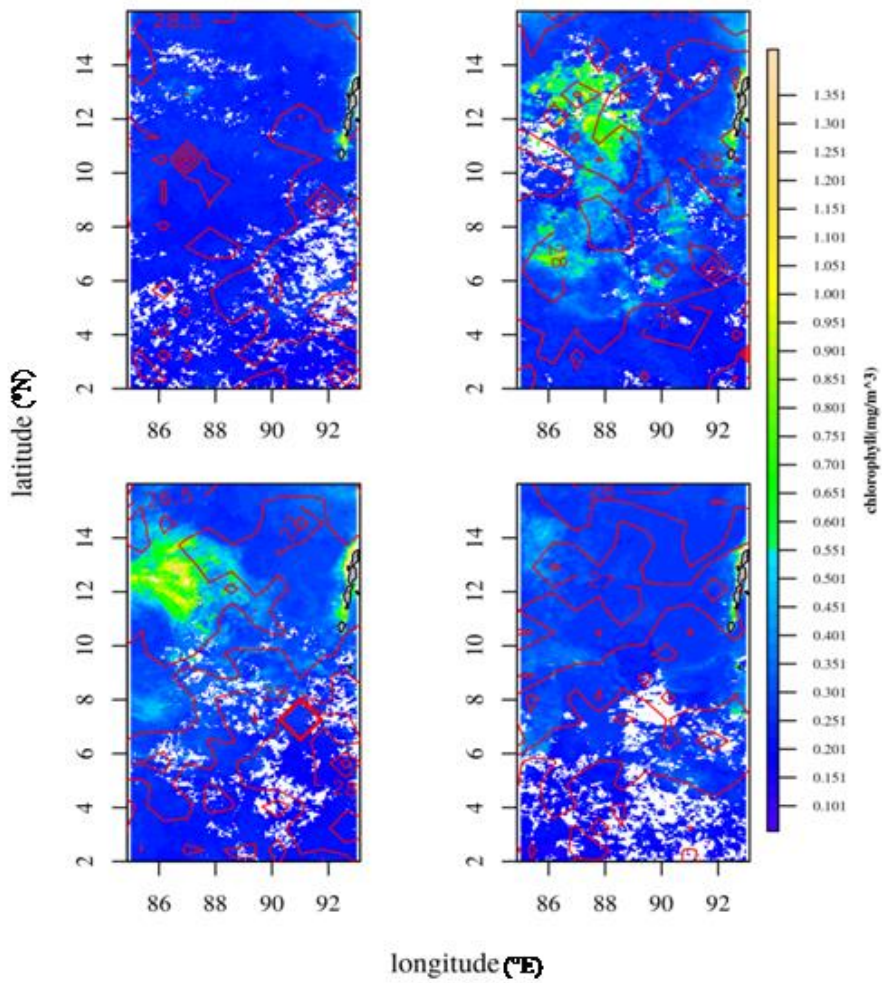

Fig.8 Overlap map of SST ( $^{\circ}\text{C}$ -monthly MODIS Aqua) and Chl a ( $\text{mg}/\text{m}^3$ -monthly MODIS Aqua) during a) November, b) December, c) January, d) February
