# Supplementary material for: Mesoscale processes regulating the upper layer dynamics of Andaman waters during winter monsoon
Source: Copernicus journal article supplement (doi:10.5194/os-2018-23), 2018-06-14
Supplement: Supplementary file [file os-2018-23-AC3-supplement.pdf]

# Mesoscale processes regulating the upper layer dynamics of Andaman waters during winter monsoon

\*Salini.T.C<sup>1</sup>, Smitha.B.R<sup>2</sup>, Sajeev.R<sup>1</sup>, Lix John. K<sup>1</sup>, Midhunshah Hussain<sup>1</sup>, Rafeeq.M<sup>2</sup>

<sup>1</sup> Cochin University of Science and Technology, Kochi, 682016, India

<sup>2</sup> Centre for Marine Living Resources & Ecology, Kochi, 682037, India

\*Corresponding Author. email: [salinitc@gmail.com](mailto:salinitc@gmail.com), ph.+91 984688249

## 1 Abstract

2 The characteristics of cold core eddies and its influence on the hydrodynamics and biological  
3 production in Andaman waters were studied using insitu and satellite observations. The specific  
4 structure and patterns of the temperature-salinity (T-S) profiles, nutrients and chl a indicate the  
5 occurrence of the eddy, the spatial extent of which is well marked in sea surface height anomaly  
6 (SSHA). The Cyclonic Eddies are tracked using Okubo-Weiss parameter of  $-2 \times 10^{-11} / s^2$  centered  
7 at 8°N and 92°E, and 13°N and 93°E (CE1 and CE2 respectively). Insitu measurements are done  
8 in the eastern flank CE1 along 8°N and 92.5-93.5°E. Vertical currents recorded using Acoustic  
9 Doppler Current Profiles (ADCP) shows northward flow along the track (0.3m/s) while along the  
10 western flank, the flow is weak and southward. This evidence the occurrence of cyclonic eddy  
11 and the altimetry derived SSHA depicts the spatial extent. Analysis to explore the possible  
12 forcings to induce the occurrence of eddy, indicate baroclinic instability ( $Ri < 0.0001$ ) in the  
13 water column due to vertical shear in the horizontal flow. The presence of Bay of Bengal (BoB)  
14 water in the region as evidenced in the T-S profiles, and the presence of semiannual Rossby  
15 waves in the region accounts the contribution, whereas, wind stress curl was not a major  
16 inductive of divergence in the region. Though less significant, the eddy is formed to influence  
17 the nutrient pattern ( $NO_2$ ,  $NO_3$ ,  $PO_4$  and  $SiO_4$ ) and the biological production (chl a). The eddy  
18 influenced the nutrient pattern ( $NO_2$ ,  $NO_3$ ,  $PO_4$  and  $SiO_4$ ) and the biological production (chl a) in  
19 the region. CE2 is associated with convective mixing processes occurring along the northwest  
20 coast of Andaman due to the prevalent cold dry continental air from north east.

## 21 Introduction

22 The Sea around the Andaman and Nicobar Island chain is influenced by reversing  
23 monsoon with moisture rich summer winds and dry continental air flow from north-east during  
24 winter (Potemra et al., 1991). The region receives enormous runoff and suspended matter from  
25 Ayeyarwady-Salween river system, which has significant influence on the hydro-dynamics and  
26 oceanography (Robinson et al., 2007). The region is characterised by strong stratification,  
27 prevents vertical mixing, causes nutrient depletion in the upper layers and subsequently leads to  
28 oligotrophy. The seasonal winds, moderate or strong, though are experienced during the  
29 summer and winter months, are not found to exert any divergence or positive curl and nutrient  
30 pumping to enrich biological production is least encountered in these waters. The sea is less  
31 productive compared to the Arabian Sea and Bay of Bengal and average primary production  
32 during fall inter-monsoon is 283.19 mg C/m<sup>2</sup>/d followed by spring inter-monsoon (249 mg  
33 C/m<sup>2</sup>/d), summer monsoon (238.98 mg C/m<sup>2</sup>/d) and winter monsoon (195.47 mg C/m<sup>2</sup>/d)  
34 [Sanjeevan et al., 2011]. Earlier observations show that the eastern and western part of the  
35 island chain is governed by distinct water properties where west shows typical BoB  
36 characteristics, northeast is highly influenced by the Ayeyarwady and Salween river system and  
37 the southeast by the productive environment of Malacca strait (Salini et al., 2010). The region is  
38 least explored for oceanic processes and surveys conducted so far for understanding the  
39 biodiversity and the basin scale environment associated with the living resources indicate the  
40 absence of any major or seasonal processes that result in nutrient pumping to alter production  
41 pattern. However, the emergence of satellite techniques, especially the Altimetry and Ocean  
42 Color imageries on mesoscale to basin scale, the understanding of the upper layer dynamics has  
43 been strengthened. Explanations have come on such major processes in the BoB, especially on  
44 number of eddies and gyres and also the impact of cyclones, which causes enormous mixing in  
45 its path (Nuncio and Prasanna Kumar, 2012). Eddies are mesoscale processes (50–200 km  
46 diameter) and ubiquitous feature of the ocean occurs in both clock-wise and anti-clock wise  
47 direction, resulting in convergence/divergence at the center.

48 Mesoscale eddies play a dominant role in transportation of salt, heat and nutrients within the  
49 ocean (Dong et al., 2014) and enhance local production in oligotrophic areas (Hyrenbach et al.,  
50 2006), ultimately influencing the production pattern in each trophic level (Bakun, 2006).  
51 Mechanisms behind the eddy formation has been suggested by many researchers; different  
52 driving mechanisms have been attributed to eddy formation, such as Ekman pumping and

53 remote forcing from the equatorial Kelvin wave reflecting off the eastern boundary as Rossby  
54 wave. According to Yu et al. (1999), westward propagating Rossby wave, excited by the  
55 remotely forced Kelvin wave, contribute substantially to the variability of the local circulation  
56 in ocean. Using the multilayer model, Potemra et al. (1991) described coastal Kelvin wave,  
57 which originates at the equator and propagates around the entire western perimeter of the region  
58 around both the Andaman Sea and the Bay of Bengal. Mesoscale eddies are observed in the  
59 coastal waters of the Andaman and Nicobar Islands (Hacker et al. 1998 and Chen et al. 2013)  
60 based on in situ hydrographic measurements. Burnaprathepart et al. (2010) described the  
61 presence of eddies in Andaman Sea and its role in enhancing the primary productivity  
62 synthesizing number of vertical profiles on chl a, major nutrients, temperature, as well as  
63 salinity. However, there are no comprehensive study undertaken for this region to explain the  
64 role of eddies (cold and warm cores) in the Andaman waters as a whole in regulating the  
65 available biological production. In this context it is attempted to enumerate these mesoscale  
66 processes based on SSHA imagery and geostrophic current pattern along with in situ evidences.  
67 The objective of this present study is to identify such processes in the basin, to explain the  
68 forcing mechanism and its response in column dynamics as well as biogeochemistry.

69

## 70 **Data and Methodology**

71 In situ measurements were taken onboard FORV *Sagar Sampada* during 21 November –  
72 14 December 2011. The environmental characteristics are understood from station based  
73 measurements in the east and west of the island chain. However, the focus was to obtain a  
74 transect with 4 stations (Fig. 1) along the eddy. The meteorological parameters like air  
75 temperature, air pressure and humidity were also collected through the instruments/sensors  
76 attached to the IRAWS onboard in 15 minute interval. Profiles of temperature, salinity,  
77 dissolved oxygen and Sigma-t were obtained using SeaBird 911 Plus CTD with Niskin water  
78 samplers and deck unit for data acquisition. The datasets are processed for 1m bins. Salinity  
79 is also derived from water samples collected through Niskin samplers and using Guildline  
80 8400A Autosol Salinometer to validate the CTD derived data.. Twelve numbers of 10 liter  
81 Niskin water samplers were used to collect water samples from standard depths (surface, 10,  
82 20, 30, 50, 75, 100, 120, 150, 200, 300, 500, 750 and 1000 m) for measurements of dissolved

83 oxygen and nutrients. Temperature-Salinity profiles for water mass characteristics are based  
84 on averaged (climatological) data from Levitus et al. (1994). Mixed Layer Depth (MLD) is  
85 derived from CTD profiles as the depth at which the seawater density ( $\sigma_t$ ) exceeds the  
86 surface density by  $0.2 \text{ kg/m}^3$  (Sprintall and Tomczak, 1993). The Isothermal Layer Depth  
87 (ILD), the depth of the top of the thermocline, is defined as the depth at which surface  
88 temperature decreases by  $1 \text{ }^\circ\text{C}$  from sea surface temperature (Kara et al., 2000 and Rao and  
89 Sivakumar, 2003). The thickness of the barrier layer is computed as the difference between  
90 ILD and MLD (Lukas and Lindstrom, 1991).

91 Monthly composite of the chlorophyll data is obtained from the Distributed Active  
92 Archive Center (DAAC) of National Aeronautics and Space Administration, NASA. Dissolved  
93 oxygen was measured by Winkler titration. Analyses of nitrite, nitrate, phosphate and silicate  
94 were performed using a Skalar Analyser.

95 Wind stress curl (daily) data used was taken from ASCAT processed by  
96 NOAA/NESDIS utilizing measurements from the Scatterometer instrument aboard  
97 the EUMETSAT Metop satellites with a spatial resolution of 25 km; chl a data was taken from  
98 MODIS Aqua Level 3 at a spatial resolution of 4 km, downloaded from Ocean Color Website  
99 and processed using SeaDas. SST was obtained from MODIS Aqua Level 3 at a spatial  
100 resolution of 4 km downloaded from Ocean Color Website, while SSHA data obtained with 7  
101 day temporal resolution from AVISO for the period from January 2003-January 2013. The cold  
102 core eddy was recognized through SSHA with geostrophic current imagery obtained from  
103 <https://oceanwatch.pifsc.noaa.gov>, and was observed to be centered at  $7^\circ \text{ N}$  and  $90^\circ \text{ E}$  with  
104 current moving in cyclonic direction. Net heat flux, solar radiation, latent heat flux, and specific  
105 humidity were obtained from <http://oaflex.whoi.edu>.

106 The eddies are spotted using two ways, first method is using SSHA contours and  
107 geostrophic currents, calculated from the following geostrophic equations,

108 
$$u = -\frac{g}{f} \frac{\partial h}{\partial y} \quad (1)$$

109 
$$v = \frac{g}{f} \frac{\partial h}{\partial x} \quad (2)$$

110 Where  $u$  and  $v$  are the zonal and meridional components of geostrophic currents,  $g$  is the  
111 gravitational acceleration,  $f$  is the Coriolis parameter,  $x$  and  $y$  are longitudinal, latitudinal co-  
112 ordinates and  $h$  is the SSHA.

113 Second method is using the Okubo-Weiss parameter, OW (Okubo, 1970 and Weiss,  
114 1991) and is defined as

$$115 \quad OW = s_n^2 + s_s^2 - w^2 \quad (3)$$

116 Where  $s_n$  is the normal strain component,  $s_s$  is the shear strain component and  $w$  is the relative  
117 vorticity.

$$118 \quad s_n = \frac{\partial u}{\partial x} - \frac{\partial v}{\partial y} \quad (4)$$

119

$$120 \quad s_s = \frac{\partial v}{\partial x} + \frac{\partial u}{\partial y} \quad (5)$$

$$121 \quad w = \frac{\partial v}{\partial x} - \frac{\partial u}{\partial y} \quad (6)$$

122 If the vortex core is dominated by vorticity, the negative Okubo-Weiss are predictable in  
123 the vortex core.

124 We used OSCAR current 5 day average data for the estimation of vertical velocity. The vertical  
125 velocity at 50m depth is calculated by assuming a homogeneous layer from sea surface to 50m  
126 depth. Since the layer is homogeneous, divergence is constant from the surface to the bottom of the  
127 homogeneous layer and hence the vertical velocity at 50m depth would be (Pond and Pickard,  
128 1983).

$$129 \quad w_{50} = - \int_0^{-50} \left[ \frac{\partial u}{\partial x} + \frac{\partial v}{\partial y} \right] dz \quad (7)$$

130 Wavelet transform is an appropriate analysis tool to study multi-scale, non-stationary  
131 processes occurring over finite spatial and temporal domain. In this study, the wavelet was  
132 used to analyse time series data of oceanographic parameters that contain non-stationary  
133 power at many different frequencies. This technique is used to decompose time series into its

134 frequency components based on the convolution of the original time series with a set of  
135 wavelet functions, and if possible, determine both the dominant modes of variability, and  
136 how those modes vary with time. It expands functions in terms of wavelets, which are  
137 generated in the form of translations and dilations of a fixed function called the Mother  
138 Wavelet. In the present study the wavelet is applied to explain the temporal variation of  
139 SSHA in the eddy region to explore the life span and frequency of the processes during the  
140 10 years. Meyers et al. (1993) used wavelet analysis to study the propagation of mixed  
141 Rossby-gravity waves in an idealized numerical model of the Indian Ocean.

142 The phase speed for long baroclinic Rossby wave is given by  $C = \frac{-gH_0\beta}{f^2}$ , (8)

143 where  $g$  is the reduced gravity term (taken as  $0.04 \text{ m s}^{-2}$  for the first baroclinic mode),  $H_0$   
144 is the thermocline depth (taken as an annual mean depth of  $20^\circ\text{C}$  isotherm derived from Levitus  
145 and Boyer, 1994),  $f$  the Coriolis parameter and  $\beta = \frac{\partial f}{\partial \phi}$ , where  $\phi$  is the latitude.

## 146 **Results and Discussion**

### 147 **Physical characteristics of the Eddy region**

148 The region is characterized by warm ( $27.6\text{--}28^\circ\text{C}$ ), humid ( $72\text{--}77\%$ ) air and wind is  
149 from northeast, suggesting the prevalence of northeast monsoon condition of magnitude in the  
150 range of  $10\text{--}12 \text{ m/s}$  with comparatively lower speed ( $10 \text{ m/s}$ ) in the western part and higher  
151 speed ( $12 \text{ m/s}$ ) in the eastern part of the eddy (referred to hereafter as CE1).

152 The SST varies in the range of  $28.4\text{--}28.8^\circ\text{C}$  with lower temperatures near the coastal  
153 water compared to offshore; the surface salinity ( $33.00 \text{ psu}$ ) and density ( $20.40 \text{ kg/m}^3$ ) values,  
154 on the other hand, are similar in coastal and offshore waters. Regional water mass  
155 characteristics from temperature, salinity, and density profiles show that the area is occupied by  
156 BoB waters with temperature ranging from  $28.0\text{--}28.5^\circ\text{C}$ , salinity  $33.2\text{--}33.8 \text{ psu}$ , and density  
157  $20.6\text{--}20.8 \text{ kg/m}^3$  (Salini et al., 2018). Vertical temperature distribution along  $8^\circ\text{N}$  (Fig. 2b)  
158 shows warm ( $>28.5^\circ\text{C}$ ) and thick isothermal layer ( $\sim 54 \text{ m}$ ) in the western part and a gradual  
159 decrease towards east ( $20 \text{ m}$ ). The most important feature in the thermal structure is the  
160 upsloping of isothermal layer, which is prominent in the subsurface ( $54\text{--}220 \text{ m}$ ) also, and the  
161 mixed layer depth (MLD) shoaled from west to east ( $47\text{--}19 \text{ m}$ ). Vertical salinity and density

162 distribution show the presence of low saline (32.9–33.1psu) water in the upper 30 m,  
163 with an upsloping tendency (Fig. 2 c, d) as in the case of temperature. Similar pattern is  
164 reflected in density characteristics too.

165 The horizontal current structure at 8° N along 92.5° E to 93.5° E shows irregular current  
166 pattern from surface to 90 m (Fig. 3). Along the eastern part of the 100 km transect, major flow  
167 is towards south ( $\cong 30$  km), west to it with a narrow and weak northward flow, followed by  
168 major southward drift up to 40 m. However, the response to this irregular pattern is  
169 insignificant in the T-S profiles and so the eastern part of the transect (~60 km) is not  
170 considered for addressing the eddy. In the western flank, the northward and the subsequent flow  
171 towards south indicate cyclonic flow direction. The current recorded at 16 m depth is  
172 considered for near surface pattern and this shows the presence of a northern component with a  
173 magnitude of 0.3 m/s in the eastern part negligible speed in the western part, directed westward.  
174 But at 40 m the current magnitude decreases in the eastern flank (0.1 m/s) and increases in  
175 magnitude in the western flank (0.1 m/s) with direction changing from northeast to southwest.  
176 The current at 88 m also follows the same pattern, but magnitude changes from 0.5 m/s in the  
177 western part and 0.4 m/s in the eastern part. The upsloping in the T-S profiles concurrent to this  
178 confirms the feature as a subsurface cyclonic eddy. The flow in the eastern flank is towards  
179 north (0.3 m/s) and at west it is to the south (0.5 m/s). The data was analyzed for all 8 m cells up  
180 to 88 m depth and found to follow the same pattern as that of near surface but with a decreasing  
181 magnitude. The dataset was seen to contain spurious values below 88 m and hence discarded.

## 182 **Eddy Generation Mechanism**

183 The possible physical mechanisms that govern the eddy includes the wind stress curl,  
184 topographic instability, shear flows, baroclinic instability and the radiation of Rossby waves  
185 from poleward propagating coastal Kelvin waves etc. (White, 1977 and Kessler, 1990). Daily  
186 wind stress curl is examined to identify the local forcing that contributes to the formation and  
187 sustenance of the eddy. Curl of the eddy region from ASCAT wind data shows negative values  
188 in the range of  $-5.6 \times 10^{-8}$  and  $-8.24 \times 10^{-8}$  Pa/m, indicating convergence and hence the contribution  
189 due to wind stress curl is ruled out.

190 Other possible eddy generation mechanisms are differential mixing of region with the  
191 adjacent sea mainly through inflow from Malacca Strait and freshwater influx from adjoining  
192 rivers leading to strong density variations in the water column. This variation may reduce or  
193 enhance the mechanical effects in the form of eddy or meanders in the region. This is measured  
194 based on the estimated Richardson Number (Ri). According to Miles (1961), the flow is stable  
195 if  $Ri > 0.25$ .

196 Ri is calculated as  $Ri = \frac{N^2}{(\frac{\partial u}{\partial z})^2}$  (9)

197 where  $N^2$  is the Brunt Vaisala frequency (BV),

198  $N^2 = \frac{-g}{\rho_0} \frac{\partial \sigma_t}{\partial z}$  (10)

199 where  $g$  is the gravitational acceleration,  $\rho_0$  the average sea water density,  $z$  the depth, and  $\sigma_t$  is  
200  $\rho - 1000$  where  $\rho$  is the sea water density. The denominator term  $\partial u / \partial z$  in (7) is the velocity  
201 gradient, which is an indicator of strength of mechanical generation calculated from vertical  
202 current profiles acquired using ADCP.

203 The low BV (avg.  $3.165 \times 10^{-5} \text{ s}^{-1}$ ) and large velocity gradient (avg.  $3.968 \text{ s}^{-2}$ ) resulted  
204 into low Ri (avg. 0.0001), indicating unstable well mixed water column. These lead to  
205 instability in the water column and favor eddy-like perturbation in the region.

206 Instability arises either as a result of mixing of different water masses or due to the shear flows.  
207 Mixing with other water masses can be ruled out as there is clear evidence of the presence of  
208 BoB water in the eddy region from the T-S profiles. Another possibility is the prevalence of  
209 planetary waves that might modulate the horizontal flow and induce shear, thereby causing  
210 instability; such instability has been well reported along this region by Schott et al., 2009 and  
211 Rao et al., 2010, that planetary waves influence the near surface circulation through local and  
212 remote forcing. The role of such planetary wave influence on eddy generation mechanism was  
213 examined using altimeter data and mapping of planetary wave propagation was carried out to  
214 identify their influence on regional circulation. Referring to Yu (2003), Hovmuller diagram of  
215 SSHA at  $8^\circ\text{N}$  along  $89^\circ\text{E}$  to  $94^\circ\text{E}$  was analyzed to track the planetary wave and are plotted (Fig.  
216 4). Low SSHA in this region from mid-November to mid-January indicates the presence of



217 upwelling mode Rossby wave (Girishkumar et al., 2011). Negative SSHA is almost horizontal,  
218 indicating a fast propagation of Rossby wave. Further west (nearer to the eddy location),  
219 negative SSHA showed a steeper slope, indicating a slower propagation. The westward  
220 propagating signal takes about 45-60 days to travel from the coast of Nicobar Island chain  
221 (Potemra et al., 1991) to the core of the eddy region, which yields phase velocity of the  
222 westward signal at 0.20 m/s. The theoretical phase speed of Rossby wave at 8°N that propagates  
223 westwards is calculated as 0.21 m/s, suggesting that the signal appearing in the plot is a Rossby  
224 wave that is generated on the west coast of Nicobar island chain. The estimated speed of the  
225 wave is close to the theoretical wave speed and the estimate also compares well with earlier  
226 results of Yang et al. (1998), Yu (2003) and Girishkumar et al. (2011). The Rossby waves were  
227 produced by radiation from the west coast of Nicobar Island chain in association with poleward  
228 propagating coastal Kelvin waves (Potemra et al., 1991). The baroclinic instability due to the  
229 interaction of westward propagating Rossby waves and local wind stress curl cause meanders  
230 and eddies in BoB (Nuncio and Prasanna Kumar, 2012). Using a numerical model, Kurien et al.  
231 (2010) also concluded that baroclinic instability plays a key role in meander growth and eddy  
232 generation in BoB. Sreenivas et al. (2012) argued that coastal Kelvin waves and the associated  
233 radiated Rossby waves from the east play a dominant role in the mesoscale eddy generation in  
234 BoB. Chen et al. (2012) studied the interannual variability mechanism of the mesoscale eddies  
235 in BoB and pointed that the eddy activities do not directly link to El Nino Southern Oscillation  
236 (ENSO) events and are sensitive to the baroclinic instability of the background flow.

237 To ascertain the periodicity of SSHA, the data is again subjected to continuous wavelet  
238 transforms with Morlet wave as mother wavelet following Torrence and Compo (1998). It is  
239 clear from Fig. 5 that the dominant mode of variability is semiannual. In the Andaman waters,  
240 the wave period is more variable due to the effect of westward propagating Rossby wave from  
241 the coastally trapped Kelvin wave (Vialard et al., 2009 and Nienhaus et al., 2012). From power  
242 and global wavelet spectrum, the predominant frequencies are in semiannual and annual modes.  
243 The annual mode seems to be reduced in intensity compared to the semiannual mode. On the  
244 basis of the results of wavelet analyses, it is clear that the semiannual Rossby waves are  
245 significant in the years 2005, 2008, 2010 and 2011, whereas the annual wavelets are significant  
246 during 2006-2009. Therefore, we concluded that the westward propagating Rossby wave  
247 radiated from the coastal Kelvin wave contribute to cyclonic eddy in the region.

## 248 **Chemical and biological response of the eddy**

249 Concurrent with the thermohaline oscillations, the vertical structure of dissolved oxygen  
250 (DO) also demonstrates fluctuations above 90 m depth. The 4.22 ml/L DO contour shoaled  
251 from a depth of about 47 m (92.3°E) to 25-30 m at eastern flank of the eddy (93.3°E). The upper  
252 nitrate (NO<sub>3</sub>) concentration is in detectable levels (0.67-0.98 μM) and shows slight upsloping  
253 towards the eastern flank (93.3°E). The phosphate (PO<sub>4</sub>) concentration in the upper water was  
254 also at a detectable level and showed a slight upsloping towards the eastern side (0.12 μM at  
255 92.3°E and 0.27 μM at 93.3°E). Further, the vertical distribution of silicate (SiO<sub>4</sub>) showed slight  
256 upsloping towards the eastern periphery (0.77 μM at 92.3°E to 1.62 μM at 93.3°E). Hence,  
257 concomitant with the thermohaline characteristics, the vertical distribution of nutrients also  
258 showed oscillations in the upper water column.

259 The physical and chemical characteristics do reflect on the regional biology and this is  
260 well reflected in the surface chl a distribution. Chl a derived from ocean colour imagery (Fig. 6)  
261 can illustrate the standing stock of the primary consumers for the optical depth and is 0.5 mg/m<sup>3</sup>  
262 in the eddy region compared to the adjacent regions (0.1 mg/m<sup>3</sup>). This increases within the eddy  
263 in association with the nutrient values explains the impact of churning due to the eddy. And this  
264 points out the significance of such mesoscale processes that influence the production marginally  
265 in the Andaman waters.

## 266 **Satellite evidence (SSHA based) for cyclonic eddies**

267 The distribution of mesoscale production favourable pockets is examined using monthly  
268 SSHA and geostrophic current pattern (Fig. 7a-d) for the winter monsoon (November-February,  
269 2011). This evidences the presence of one cyclonic eddy (CE), of which CE1 is the same that  
270 encountered during the in situ measurements. CE1 was stronger as indicated by negative SSHA  
271 between 5°–9°N with core at 7° N latitude and is observed to be propagating from 93°E to 86°E  
272 within one month (November to December). The eddy intensity is more during November and  
273 December, with a negative value of ~0.14m. In December CE1 propagates westward to BoB and  
274 is observed between 86°-93°E. It is completely replaced from Andaman waters by January and  
275 exhibited a positive SSHA (0.18 m). But the low SSHA observed in BoB waters even during  
276 February centered at 86° E. The shape of the eddy is elliptical with its axis oriented in east west

277 direction. The eddy CE1 characteristics and generating mechanism is described in the above  
278 sections (3.3.1-3.3.3) using in situ as well as satellite observations.

279 The SSHA maps also revealed a low SSHA pocket located at 13°N and 93°E during  
280 November with negative anomaly of  $-0.12\text{m}$ . This is marked as CE2. The negative anomaly is  
281 more in November with SSHA of  $-0.12\text{ m}$ , and the intensity decreases during December with  
282 SSHA of  $-0.10$ . Negative anomaly is replaced by positive anomaly of  $0.16\text{m}$  during January.

283 In order to identify eddies in a prominent way, Okubo-Weiss (OW) parameter method is  
284 also exercised in this study. Eddies are characterized with negative OW parameter at the eddy  
285 core due to the dominance of vorticity over strain components; while strain dominated areas  
286 have positive OW parameter. According to Isern-Fontanet et al. (2003), closed contours of OW  
287 with a value of  $-2 \times 10^{-11} / \text{s}^2$  corresponding to the threshold value for defining eddies. The  
288 threshold value was fixed as same as Isern-Fontanet et al. (2003) for defining eddies and finding  
289 out the vorticity dominated area. From the Fig.7, the closed contours of OW, and cyclonic  
290 current structure confirmed the presence of an intensified cyclonic eddy at 8°N and 93°E. But  
291 the area characterized with threshold value less than  $-2 \times 10^{-11} / \text{s}^2$ , negative SSHA and the  
292 cyclonic current structure at 13°N and 93°E indicated the presence of a weak eddy.

293 Fig. 8 represents the vertical velocity at 50m depth in the Andaman waters and the eddy region  
294 CE1 is characterized with higher positive vertical velocity of  $0.5-1.5 \times 10^{-5} \text{ m/s}$ . This indicates the  
295 development of upwelling process in the region.

296 Having recognized eddies from SSHA, OW and geostrophic current maps, it is further  
297 confirmed the occurrence of prevailing processes using SST and chlorophyll. Cyclonic eddies  
298 formed due to the divergent forcing at the center is occupied with sub-surface nutrient rich  
299 waters at the core. These areas of negative SSHA are characterised with relatively cool and high  
300 chlorophyll concentration.

301 SST is high during the initial phase of winter months, i.e. in November (Fig. 9a), with  
302 higher values in the entire region of Andaman waters ( $28.2-28.8\text{ }^\circ\text{C}$ ). During December (Fig.  
303 9b), the values change to  $27.6-28.8\text{ }^\circ\text{C}$ . Further, during January (Fig. 9c) and February (Fig. 9d),  
304 the basin wide temperature is in the range to  $27-29\text{ }^\circ\text{C}$  and  $26-29\text{ }^\circ\text{C}$  respectively. Though the  
305 Andaman waters are warm in general, the cold core eddies identified in this area show relatively

306 cool temperatures owing to the prevalent cyclonic flow associated with it. CE1 records a  
307 temperature of 28.6 °C during November, and when the eddy advances to the Andaman waters  
308 the surface temperatures begin to cool. SST decreases from 28.6 to 28.2 °C during December;  
309 SST again decreases to 27.6 °C in January. But in February the temperature remains the same as  
310 in January. CE2 displays a temperature of 28.6 °C during November; during December, the  
311 temperature decreases to 28.2 °C, and decreases further to 27 °C during January and again in  
312 February (26.5 °C). The hike in temperature along the eastern Andaman waters might be due to  
313 the intrusion of low saline waters through Malacca strait as inferred by Rama Raju et al., 1981,  
314 and Tan et al., 2006.

315 High chlorophyll concentration is expected in the eddy region due to enhancement of  
316 nutrients at the surface. These cold core eddies are important because they are in the area of  
317 high biological activity and these areas are observed to have strong physical and  
318 biogeochemical coupling resulting in high chlorophyll concentration. Generally, Andaman  
319 waters are oligotrophic in nature with less chlorophyll concentrations (Vijayalakshmi et al.,  
320 2010). The existence of cyclonic circulation increases the chl a levels in the eddy region. When  
321 the cyclonic flow advances, increased chl a level was observed in the eddy locations at CE1 and  
322 CE2. CE1 recorded 0.1 mg/m<sup>3</sup> during November, increased to 0.8 mg/m<sup>3</sup> during December and  
323 decreased again to 0.3 mg/m<sup>3</sup> in January (Fig. 9 a-d). Chl a level decreased to 0.2 mg/m<sup>3</sup> in  
324 February. CE2 revealed a very low value (0.1 mg/m<sup>3</sup>) during November; during December, chl  
325 a began to increase in the eddy region (0.4 mg/m<sup>3</sup>) and in January also the pattern followed with  
326 a concentration of 0.4 mg/m<sup>3</sup>, which decreased to 0.2 mg/m<sup>3</sup> in February.

327 The role of wind stress curl on inducing the eddy was verified with weekly progress in  
328 the wind stress curl (ASCAT) for the pockets. At CE1 the curl varied from  $-4.43 \times 10^{-7}$  to  
329  $1.28 \times 10^{-6}$  Pa/m, but the mode of the signal was  $-1.47 \times 10^{-7}$  Pa/m. The wind curl at CE2 showed  
330 values between  $-2.87 \times 10^{-7}$  and  $2.09 \times 10^{-6}$  Pa/m and mode was  $-3.25 \times 10^{-8}$  Pa/m. However, the  
331 occurrence of maximum negative values implies that wind is not a dominant causative factor for  
332 the generation of eddy.

333 At CE2, the surface temperature is low (27-27.2 °C) compared to the nearby locations  
334 and the MLD is also deeper (>70m). Wind is northeasterly, with a magnitude of 4 to 7 m/s.  
335 Specific humidity of 14 to 18 g/kg implies dry continental air during the period. Net heat flux

336 varies from  $-98$  to  $-134$   $\text{W/m}^2$  during November-February. This causes heat loss due to  
337 evaporation (latent heat flux  $-220$  to  $-312$   $\text{W/m}^2$ ), resulting in cooling in the sea surface. Solar  
338 radiation varies from  $114$  to  $170$   $\text{W/m}^2$  in the eddy region. This low solar insolation reduces the  
339 SST, resulting densification of water. Thus, the surface water sinks and nutrient rich water  
340 entrains from deeper depths. This evidences that the atmospheric forcing causes surface cooling  
341 and the resulting convective mixing entrains nutrients into the upper layer which activates the  
342 primary production (Prasanna Kumar and Prasad, 1996, Madhupratap et al., 1996). Chatterjee et  
343 al. (2016) reported that the equatorial signal of Kelvin comes into the Andaman Sea through the  
344 Great Channel, travels along the eastern boundary, and exits to BoB through Preparis Channel,  
345 with a smaller part flowing southward along the east coast of the Andaman Islands. In this  
346 context it is presumed that the generating mechanism of CE2 is Kelvin. The instability owing to  
347 the flow from Ayeyarwady-Salween river system is also supposed to be the reason for CE2  
348 origin.

#### 349 **Conclusion**

350 The column dynamics, forcing mechanisms, chemical and biological responses of cyclonic  
351 eddies are explained for the Andaman waters based on a suit of in situ and satellite datasets. The  
352 eddies are tracked using Okubo-Weiss parameter and the eddy CE1 is strong compared to CE2  
353 based on the threshold Okubo-Weiss parameter of  $-2 \times 10^{-11} / \text{s}^2$ . The processes are small scale in  
354 nature within 100-350 km diameter, and are found to be induced as a result of baroclinic  
355 instability arising owing to the westward propagating Rossby wave, semi-annual mode with  
356 phase speed of 0.20 m/s for CE1 and CE2 may be induced by Kelvin and the instability occurs  
357 due to the Ayeyarwady-Salween flow. While CE2 is associated with the process of convective  
358 mixing process occurring in the region due to cold dry continental air from north east. The study  
359 concludes that, in addition to the mesoscale processes, the convective mixing occurring along  
360 the northwest coast of Andaman is taking a substantial role in triggering the biological  
361 production of Andaman waters. Considerable increases in the regional surface biological  
362 production indicates the complementary role of such processes in bringing up the quality of  
363 production in Andaman waters. The role of convective mixing and eddies in the dynamics of the  
364 Andaman waters are explained for the first time.

365

366 **Acknowledgements**

367 Authors are grateful to the Ministry of Earth Sciences for supporting  
368 the work and for providing facilities onboard FORV Sagar Sampada for in-situ  
369 measurements. All the fellow participants of the cruise FORV SS292 are  
370 thankfully acknowledged. Insitu data are obtained from FORV Data Centre in CMLRE.ASCAT  
371 Scatterometer wind field is obtained from NOAA/NESDIS. The TOPEX/Poseidon SSHA  
372 product is generated from the Merged Geophysical Data Record. Chlorophyll data was retrieved  
373 from GSFC NASA. Heat flux data is provided by WHOI OAFflux project.

374 **References**

375 Bakun, A. (2006). Fronts and Eddies as Key Structures in the Habitat of Marine Fish  
376 Larvae:Opportunity, Adaptive Response and Competitive Advantage.*Scientia Marina*, 70 (S2),  
377 105–122.

378 Buranapratheprat, A., Laongmanee, P., Sukramongkol, N., Prommas, R., Promjinda, S., &  
379 Yanagi, T. (2010). Upwelling Induced by Mesoscale Cyclonic Eddies in the Andaman  
380 Sea.*Coastal Marine Science*, 34 (1), 68–73.

381 Chen Gengxin, Wang Dongxiao & Hou Yijun. (2012). The features and interannual variability  
382 mechanism of mesoscale eddies in the Bay of Bengal. *Continental Shelf Research*, 47, 178-185.

383 Chen, X., Pan, D., Bai, He, X., Chen, C.A., & Hao, Z. (2013). Episodic Phytoplankton  
384 BloomEvents in the Bay of Bengal Triggered by Multiple Forcings.*Deep Sea Research Part I:  
385 Oceanographic Research Papers*,73,17–30.

386 Dong, C., McWilliams, J.C., Liu, Y., & Chen, D (2014). Global heat and salt transports by eddy  
387 movement.*Nat. Commun.*, 5, 3294.

388 Girishkumar, M.S., Ravichandran, M., McPhaden, M.J., & Rao, R.R. (2011). Intraseasonal  
389 variability in barrier layerthickness in the south central Bay of Bengal. *Journal of Geophysical  
390 Research*, 116, C03009.

391 Hacker, P., E. Firing, J. Hummon, Gordon, A.L., & Kindle, J.C. (1998). Bay of Bengal Currents  
392 during the Northeast Monsoon. *Geophysical Research Letters*. 25 (15), 2769–2772.

393 Hyrenbach, K. D., Veit, R.R., Weimerskirch, H., & Hunt, G.L. (2006). Seabird Associations with  
394 Mesoscale Eddies: The Subtropical Indian Ocean. *Marine Ecology Progress Series*, 324, 271–  
395 279.

396 Jury, R. M., & Huang, B. (2004). The Rossby wave as a key mechanism of Indian Ocean climate  
397 variability, *Deep Sea Res. Part I*, 51, 2123–2136.

398 Kessler, W. S. (1990). Observations of long Rossby waves in the northern tropical Pacific. *J.*  
399 *Geophys. Res.*, 95, 5183–5217.

400 Kurien, P., Ikeda, M., & Valsala, V.K. (2010). Mesoscale variability along the east coast of India  
401 in spring as revealed from satellite data and OGCM simulations, *J. Oceanogr.*, 66, 273–289.

402 Levitus, S., & Boyer, T. (1994). World Ocean Atlas 1994, Vol 4: Temperature, NOAA Atlas  
403 NESDIS 4, U.S. Govt. Printing Office, 150.

404 Levitus, S., Burgett, R., & Boyer, T. (1994): World Ocean Atlas 1994, Vol 3: Salinity, NOAA  
405 Atlas NESDIS 3, U.S. Govt. Printing Office, 150.

406 Madhupratap, M., Prasanna Kumar, S., Bhattathiri, P.M.A., Dileep kumar, M., Raghukumar, S.,  
407 Nair., K.K.C., & Ramaiah, N. (1996). Mechanism of the biological response to winter cooling in  
408 the northeastern Arabian Sea. *Nature*, 384, 549 – 552.

409 Meyers, S. D., Kelly, B.G., & O'Brien, J.J. (1993). An introduction to wavelet analysis in  
410 oceanography and meteorology: With application to the dispersion of Yanai waves. *Mon. Wea.*  
411 *Rev.*, 121, 2858–2866.

412 Miles, J.W. (1961). On the stability of heterogeneous shear flows. *Journal of Fluid Mechanics*,  
413 10, 496-508.

414 Nienhaus, M. J., Subrahmanyam, B., & Murty, V.S.N. (2012). Altimetric observations and  
415 model simulations of coastal Kelvin Waves in the Bay of Bengal, *Mar. Geod.*, 35(1), 190–216.

416 Nuncio, M., & Prasanna Kumar, S. (2012). Life cycle of eddies along the western boundary of  
417 the Bay of Bengal and their implications, *J. Marine Syst.*, 94, 9-17.

418 Pond, Stephen and George L Pickard. (1983). Introduction to Dynamical Oceanography; 2nd  
419 Edition. Butterworth-Heinemann Ltd: Woburn, MA.

420 Potemra, J.T., Luther, M.E., & O'Brien, J.J. (1991). The seasonal circulation of the upper ocean  
421 in The Bay of Bengal. *Journal of Geophysical Research*, 96, 667-683.

422 Prasanna Kumar, S. & Prasad, T.G. (1996). Winter cooling in the northern Arabian Sea. *Current*  
423 *Science*, 71, 834-841.

424 Rama Raju, D. V., Gouveia, A. D., & Murthy, C. S. (1981). Some physical characteristics of  
425 Andaman Sea Waters during winter. *Indian Journal of Marine Sciences*, 10, 211–218.

426 Robinson, R.A.J., Bird, M.I., Oo, N.W, Hoey, T.B., Aye, M.M.D., Higgitt, L., Lud, X.X., Swe,  
427 A., Tun, T., & Win, S.L. (2007). The Irrawaddy river sediment flux to the Indian Ocean:the  
428 original nineteenth-century data revisited. *Journal of Geology*. 115, 629–640.

429 Salini, T.C., Fanimol, C.L., Smitha, B.R., Jayalakshmi, K.J., Asha Devi, C.R., Sanjeevan, V.N.,  
430 Saravanane, N., & Sajeev, R. (2010). Oceanography of the Andaman Waters: Physico-chemical  
431 and biological characteristics during Januaryuary 2009. In: Indian Ocean Marine Living  
432 Resources, Book of Abstracts (Ed. G.V.M.Gupta et al), Centre for Marine Living Resources and  
433 Ecology, Ministry of Earth Sciences, Kochi, 29.

434 Sanjeevan, V.N., Smitha, B.R., Ashadevi, C.R., Abdul Jaleel, K.U. and Jayalalshmi, K.J., 2011.  
435 Revalidation of Potential Yield from Indian EEZ.A trophodynamic approach. *In Report of the*  
436 *Working Group for revalidating the potential of fishery resources in the Indian EEZ*, New Delhi.

437 Schott, F. A., Xie, S.P., & McCreary Jr., J.P. (2009). Indian Ocean circulation and climate  
438 variability, *Rev. Geophys.*, 47, RG1002.

439 Sindhu, B., Suresh, I., Unnikrishnan, A.S., Bhatkar N.V., Neetu, S., Michael, G S. (2007).  
440 Improved bathymetric datasets for the shallow water regions in the Indian Ocean. *J. Earth Syst.*  
441 *Sci.*, 116(3), 261-274.

442 Sreenivas, P., Chowdary, J.S., Gnanaseelan., C. (2012b). Impact of tropical cyclones on the  
443 intensity and phase propagation of fall Wyrтки jets. *Geophys Res. Lett.*, 9, L22603.



444 Tan, C.K., Ishizaka, J., Matsumura, S., Md.Yusoff, F., Hj.Mohamed, & M.I. (2006). Seasonal  
445 variability of SeaWiFS chlorophyll a in the Malacca Straits in relation to Asian monsoon.  
446 *Continental Shelf Research*, 26, 168-178.

447 Torrence C., & Compo, G.P. (1998). A Practical Guide to Wavelet Analysis, *Bull. of the*  
448 *American Met. Soc.*, 79, 61-78.

449 Vialard, J., Shenoi, S.S.C., McCreary Jr, J.P., Shankar, D., Durand, F., Fernando, V., & Shetye,  
450 S.R. (2009). Intraseasonal response of the northern Indian Ocean coastal waveguide to the  
451 Madden-Julian Oscillation, *Geo. Phys. Res. Letts.*, 36.

452 Vijayalakshmi R. Nair, & Gireesh, R. (2010). Biodiversity of chaetognaths of the Andaman Sea.  
453 Indian Ocean. *Deep Sea Research II*, 57, 2135-2147.

454 White, W. B. (1977). Annual forcing of baroclinic long waves in the tropical North Pacific..*J.*  
455 *Phys. Oceanogr.*, 7, 50–61.

456 Yang, J., Yu, L., Koblinsky, C.J., & Adamec, D. (1998). Dynamics of the seasonal variations in  
457 the Indian Ocean from TOPEX/POSEIDON sea surface height and an ocean model, *Geophys.*  
458 *Res. Letts.*, 25 (11), 1915 - 1918.

459 Yu, L. (2003). Variability of the depth of the 20°C isotherm along 6°N in the BoB: its response  
460 to remote and local forcing and its relation to satellite SSH variability. *Deep-Sea ResearchII*, 50,  
461 2285–2304.

462 Yu, L. S., & Rienecker, M.M. (1999). Mechanisms for the Indian Oceanwarming during the  
463 1997-98 El Nino. *Geophys. Res. Lett.*, 26 735738.
